# Supplementary material for: Conspicuously concealed: revision of the arid clade of the Gehyra variegata (Gekkonidae) group in Western Australia using an integrative molecular and morphological approach, with the description of five cryptic species
Source: PeerJ. 2018 Jul 19;6:e5334. doi: 10.7717/peerj.5334 (PMC6054870; doi:10.7717/peerj.5334)
Supplement: Supplemental Information 2 — Covers all species treated herein, divided by sex (M or F). Sample sizes are provided after the species name and sex. Abbreviations and definitions of characters: SVL (snout-vent length)–from tip of snout to anterior edge of cloaca; TailL (tail length)–from posterior edge of cloaca to tip of tail, original tails only; HeadL (head length)–measured obliquely from tip of snout to retroarticular process at edge of jaw; HeadW (head width)–measured at widest part of head between eyes and ears; HeadD (head depth)–measured between eyes and ears; OrbitL (orbit length)–measured horizontally at widest point; EyeNarL (eye to naris length)–measured obliquely from anterior corner of eye to centre of nostril; SnoutEyeL (snout to eye length)–measured obliquely from anterior corner of eye to tip of snout; InterOrbL (interorbital length)–from anterior corners of eyes; InterNarL (internarial length)–measured from centre of each nostril; LegL (leg length)–from knee to heel; SupLab (supralabials), InfLab (infralabials)–enlarged scales counted until size reached that of normal background scales; Internarials–number of small scales between enlarged supranasals; 4TLam (fourth toe lamellae)–number of enlarged lamellae on the underside of the fourth toe; Pre-cloacal pores–number of pores anterior to cloaca in males, pore perforating centre of enlarged scales. [file peerj-06-5334-s002.xlsx]

## Sheet: Sheet1
Table S1. Specimen information for species treated here. All specimens are from the Western Australian Museum (R prefixes omitted from the registration numbers).
Registration	Species	Genotyped	Morphology	Latitude	Longitude	Site	State
11518	G. capensis sp. nov.		•	-22.2500	114.0833	Learmonth	WA
11520	G. capensis sp. nov.		•	-22.2500	114.0833	Learmonth	WA
11522	G. capensis sp. nov.		•	-22.2500	114.0833	Learmonth	WA
11523	G. capensis sp. nov.		•	-22.2500	114.0833	Learmonth	WA
16107	G. capensis sp. nov.		•	-22.0500	114.0167	Shothole Canyon	WA
16108	G. capensis sp. nov.		•	-22.0500	114.0167	Shothole Canyon	WA
16109	G. capensis sp. nov.		•	-22.0500	114.0167	Shothole Canyon	WA
16110	G. capensis sp. nov.		•	-22.0500	114.0167	Shothole Canyon	WA
16999	G. capensis sp. nov.		•	-22.0500	114.0333	Shothole Canyon	WA
27576	G. capensis sp. nov.		•	-21.9333	113.9667	Tantabiddi Well	WA
52131	G. capensis sp. nov.		•	-25.1333	116.9000	Landor	WA
52924	G. capensis sp. nov.		•	-22.0500	114.0333	Shothole Canyon, Cape Range	WA
52925	G. capensis sp. nov.		•	-22.0500	114.0333	Shothole Canyon, Cape Range	WA
52926	G. capensis sp. nov.		•	-22.0500	114.0333	Shothole Canyon, Cape Range	WA
52927	G. capensis sp. nov.		•	-22.0500	114.0333	Shothole Canyon, Cape Range	WA
52995	G. capensis sp. nov.		•	-21.9333	114.1167	Exmouth	WA
61097	G. capensis sp. nov.		•	-22.3333	113.8167	Yardie Creek, The Watercourse	WA
61098	G. capensis sp. nov.		•	-22.3333	113.8167	Yardie Creek, The Watercourse	WA
61099	G. capensis sp. nov.		•	-22.3333	113.8167	Yardie Creek, The Watercourse	WA
61198	G. capensis sp. nov.		•	-21.8166	114.1000	Vlaming Head Lighthouse	WA
61273	G. capensis sp. nov.		•	-22.0500	114.0333	Shothole Canyon	WA
61274	G. capensis sp. nov.		•	-22.0500	114.0333	Shothole Canyon	WA
61475	G. capensis sp. nov.		•	-22.3333	113.8000	Yardie Creek Mouth	WA
117868	G. capensis sp. nov.	•		-21.8000	114.1000	Vlaming Head	WA
117869	G. capensis sp. nov.	•		-21.808	114.111	Vlaming Head	WA
123945	G. capensis sp. nov.	•		-22.0000	114.0833	Cape Range, 10km S Exmouth	WA
123947	G. capensis sp. nov.	•		-22.0000	114.0833	Cape Range, 10km S Exmouth	WA
123949	G. capensis sp. nov.	•		-21.816	114.188	Point Murat, 12km N Exmouth	WA
134628	G. capensis sp. nov.		•	-21.8700	114.1169	8km N Exmouth	WA
139561	G. capensis sp. nov.	•	•	-22.1333	114.0333	22km SSW Exmouth	WA
153815	G. capensis sp. nov.	•		-21.808	114.111	Vlaming Head	WA
153816	G. capensis sp. nov.	•		-21.808	114.111	Vlaming Head	WA
153817	G. capensis sp. nov.	•		-21.808	114.111	Vlaming Head	WA
153818	G. capensis sp. nov.	•		-21.808	114.111	Vlaming Head	WA
174301	G. capensis sp. nov.	•		-22.09023	114.01067	Charles Knife Rd, Cape Range National Park	WA
174302	G. capensis sp. nov.	•		-22.09023	114.01067	Charles Knife Rd, Cape Range National Park	WA
174303	G. capensis sp. nov.	•		-22.08978	114.01114	Charles Knife Rd, Cape Range National Park	WA
174316	G. capensis sp. nov.	•		-22.15013	113.88504	Mandu-Mandu Gorge, Cape Range National Park	WA
102142	G. crypta sp. nov.	•		-22.6027	118.4597	10km NW Mount Windell	WA
102143	G. crypta sp. nov.	•		-22.6027	118.4597	10km NW Mount Windell	WA
102144	G. crypta sp. nov.	•	•	-22.6027	118.4597	10km NW Mount Windell	WA
102225	G. crypta sp. nov.	•		-23.3891	115.8867	Barlee Range Nature Reserve	WA
102806	G. crypta sp. nov.	•		-20.5275	116.8214	Burrup Peninsula	WA
106014	G. crypta sp. nov.	•		-24.5000	115.0833	Kennedy Range	WA
106091	G. crypta sp. nov.	•		-27.0333	116.3000	5km NE Mount Welcome	WA
108344	G. crypta sp. nov.	•	•	-21.6333	115.1167	Onslow	WA
108600	G. crypta sp. nov.	•	•	-21.7833	116.2500	12km SW Pannawonica	WA
108602	G. crypta sp. nov.	•		-21.7833	116.2500	12km SW Pannawonica	WA
108849	G. crypta sp. nov.	•	•	-21.0333	116.8167	Cherralta Homestead	WA
110015	G. crypta sp. nov.	•	•	-20.8521	116.945	17km Se Karratha	WA
110025	G. crypta sp. nov.	•	•	-20.8526	117.096	3.5km Wnw Mount Gregory	WA
110088	G. crypta sp. nov.	•		-21.7868	117.862	0.2km N Mount Florance Homestead	WA
110176	G. crypta sp. nov.	•		-21.8562	117.98	14.5km Se Mount Florance Homestead	WA
110186	G. crypta sp. nov.	•		-21.5713	117.056	2.6km Nnw Millstream	WA
110207	G. crypta sp. nov.	•	•	-21.5713	117.056	2.6km Nnw Millstream	WA
110224	G. crypta sp. nov.	•	•	-21.5773	117.062	2.1km Nne Millstream	WA
110228	G. crypta sp. nov.	•	•	-21.3841	117.061	16km Ne Goolbung Hill	WA
110558	G. crypta sp. nov.	•	•	-21.5773	117.062	2.1km Nne Millstream	WA
111672	G. crypta sp. nov.	•	•	-22.583	118.457	1km Nnw Mount Bruce	WA
111692	G. crypta sp. nov.	•		-22.357	118.287	14km Ssw Weano Gorge	WA
111693	G. crypta sp. nov.	•	•	-22.583	118.457	1km Nnw Mount Bruce	WA
113241	G. crypta sp. nov.	•		-21.7333	116.2500	Junction Of Jimmawurrada Creek And Robe River	WA
114305	G. crypta sp. nov.	•		-22.2333	118.3167	Wittenoom	WA
114306	G. crypta sp. nov.	•		-22.2333	118.3167	Wittenoom	WA
117014	G. crypta sp. nov.	•		-23.3833	117.8667	Nanjilgardy Pool, Turee Creek	WA
117018	G. crypta sp. nov.	•		-24.3166	116.9167	Mount Augustus Hs	WA
117019	G. crypta sp. nov.	•		-24.3166	116.9167	Mount Augustus Hs	WA
117044	G. crypta sp. nov.	•		-23.5000	117.5000	Ashburton Valley	WA
117060	G. crypta sp. nov.	•		-23.5000	117.5000	Ashburton Valley	WA
117151	G. crypta sp. nov.	•	•	-29.3666	121.2833	Dead Horse Rocks, 6.5 Km N Menzies	WA
117152	G. crypta sp. nov.	•	•	-29.3666	121.2833	Dead Horse Rocks, 6.5km N Menzies	WA
119017	G. crypta sp. nov.	•		-28.0000	120.5000	63km E Sandstone (Road To Leinster)	WA
119018	G. crypta sp. nov.	•		-28.5166	119.0167	5km N Yuinmery	WA
119019	G. crypta sp. nov.	•		-22.9000	119.0833	Hope Downs, 95km Ne Newman	WA
119938	G. crypta sp. nov.	•		-22.4666	117.3000	3.5km Ne Mount Brockman	WA
120018	G. crypta sp. nov.	•		-22.9902	119.0917	Hope Downs	WA
120024	G. crypta sp. nov.	•		-22.9569	119.1389	Hope Downs	WA
120510	G. crypta sp. nov.	•		-24.5513	114.9589	Kennedy Range National Park	WA
123251	G. crypta sp. nov.	•		-24.5230	114.9656	Kennedy Range National Park	WA
123850	G. crypta sp. nov.	•		-25.2100	115.5142	39km Ese Gascoyne Junction	WA
125739	G. crypta sp. nov.	•		-20.5847	116.7900	Burrup Peninsula, Near Karratha	WA
125745	G. crypta sp. nov.	•	•	-21.5944	117.0653	Millstream Rangers Station	WA
126067	G. crypta sp. nov.	•		-28.0000	117.8333	5km N Mount Magnet	WA
127613	G. crypta sp. nov.	•		-28.6327	122.3200	8km W Laverton	WA
129606	G. crypta sp. nov.	•		-22.9166	118.9000	120km Nw Newman	WA
129611	G. crypta sp. nov.	•		-22.9166	118.9500	120km Nw Newman	WA
129903	G. crypta sp. nov.	•	•	-23.2500	118.6667	West Angelas, 100km Wnw Newman	WA
132526	G. crypta sp. nov.	•	•	-20.6125	116.7936	Burrup Peninsula	WA
132635	G. crypta sp. nov.	•	•	-20.5963	116.8108	Burrup Peninsula	WA
132636	G. crypta sp. nov.	•		-20.5927	116.7994	Burrup Peninsula	WA
135207	G. crypta sp. nov.	•	•	-32.1602	121.7417	10km Nw Norseman	WA
135257	G. crypta sp. nov.	•		-23.0672	118.8858	Hope Downs	WA
135298	G. crypta sp. nov.	•		-20.8100	116.9419	Cape Lambert	WA
135310	G. crypta sp. nov.	•		-20.6433	116.9419	Cape Lambert	WA
135323	G. crypta sp. nov.	•		-20.8100	116.9419	Cape Lambert	WA
135345	G. crypta sp. nov.	•		-22.4141	117.3550	Mount Brockman	WA
135347	G. crypta sp. nov.	•		-22.2919	117.3008	Mount Brockman	WA
135367	G. crypta sp. nov.	•		-22.3075	117.2575	Mount Brockman	WA
135377	G. crypta sp. nov.	•		-22.4141	117.3550	Mount Brockman	WA
135464	G. crypta sp. nov.	•		-22.4666	117.3000	Mount Brockman Area	WA
136590	G. crypta sp. nov.	•		-27.7141	119.6044	Lake Mason Station	WA
140699	G. crypta sp. nov.	•		-22.6736	119.4161	Hope Downs	WA
145721	G. crypta sp. nov.	•		-22.9688	119.1619	Weeli Wolli Creek	WA
145731	G. crypta sp. nov.	•		-22.8338	119.1778	Weeli Wolli Creek	WA
145732	G. crypta sp. nov.	•		-22.8338	119.1778	Weeli Wolli Creek	WA
151159	G. crypta sp. nov.	•		-22.4894	117.6914	Tom Price Area	WA
151160	G. crypta sp. nov.	•	•	-22.4894	117.6914	Tom Price Area	WA
156477	G. crypta sp. nov.	•		-22.6833	118.9500	Upper Marillana Creek	WA
156479	G. crypta sp. nov.	•		-22.6833	118.9500	Upper Marillana Creek	WA
156482	G. crypta sp. nov.	•	•	-22.6833	118.9500	Upper Marillana Creek	WA
157121	G. crypta sp. nov.	•	•	-23.1991	118.8469	West Angelas	WA
157125	G. crypta sp. nov.	•		-23.1861	118.8736	West Angelas	WA
157714	G. crypta sp. nov.	•		-22.9341	118.8875	Packsaddle Range	WA
158069	G. crypta sp. nov.	•	•	-21.5773	117.062	2.1km Nne Millstream	WA
160907	G. crypta sp. nov.	•		-20.8521	116.945	17km Se Karratha	WA
160908	G. crypta sp. nov.	•		-20.8521	116.945	17km Se Karratha	WA
162091	G. crypta sp. nov.	•		-22.7727	116.522	22.5km Ese Mount De Courcey	WA
162248	G. crypta sp. nov.	•		-22.8372	119.271	11km Ne Weelie Wollie Spring	WA
162379	G. crypta sp. nov.	•		-21.8562	117.98	14.5km Se Mount Florance Homestead	WA
162445	G. crypta sp. nov.	•	•	-26.591	118.497	Meekatharra	WA
162836	G. crypta sp. nov.	•	•	-23.2839	118.102	45km Ese Paraburdoo	WA
162880	G. crypta sp. nov.	•		-23.3181	117.871	24km Se Paraburdoo	WA
163006	G. crypta sp. nov.	•		-22.8635	115.503	6km Se Mundora Hill	WA
165068	G. crypta sp. nov.	•		-21.6424	117.037	6km Sw Millstream	WA
165074	G. crypta sp. nov.	•	•	-21.587	117.071	Millstream Homestead	WA
165075	G. crypta sp. nov.	•	•	-21.587	117.071	Millstream Homestead	WA
165077	G. crypta sp. nov.	•		-21.6424	117.037	6km Sw Millstream	WA
165142	G. crypta sp. nov.	•	•	-21.5773	117.062	2.1km Nne Millstream	WA
165143	G. crypta sp. nov.	•		-21.5773	117.062	2.1km Nne Millstream	WA
165164	G. crypta sp. nov.	•		-20.8761	116.647	2km Nw Karratha Station	WA
165505	G. crypta sp. nov.	•	•	-20.6855	116.6303	West Intercourse Island	WA
165523	G. crypta sp. nov.	•		-20.6869	116.6325	West Intercourse Island	WA
165853	G. crypta sp. nov.	•		-23.2875	119.2983	80km Nw Newman	WA
170240	G. crypta sp. nov.	•		-23.3644	117.625	19km Ssw Paraburdoo	WA
170276	G. crypta sp. nov.	•		-23.2864	118.124	47.5km Ese Paraburdoo	WA
170294	G. crypta sp. nov.	•	•	-23.3644	117.625	19km Ssw Paraburdoo	WA
170303	G. crypta sp. nov.	•	•	-23.2839	118.102	45km Ese Paraburdoo	WA
170307	G. crypta sp. nov.	•		-23.2839	118.102	45km Ese Paraburdoo	WA
170786	G. crypta sp. nov.	•		-21.8428	116.353	11km Ese Mount Dempster	WA
170800	G. crypta sp. nov.	•		-21.7108	116.766	14.5km Nnw Mount Elvire	WA
99134	G. incognita sp. nov.	•	•	-21.6094	118.9744	Woodstock Station	WA
100666	G. incognita sp. nov.	•	•	-21.6091	118.9742	Woodstock Station	WA
104062	G. incognita sp. nov.	•	•	-21.6091	118.9742	Woodstock Station	WA
104168	G. incognita sp. nov.	•	•	-21.6091	118.9742	Woodstock Station	WA
104169	G. incognita sp. nov.	•	•	-21.6091	118.9742	Woodstock Station	WA
108615	G. incognita sp. nov.	•	•	-25.0166	121.5833	Weld Springs (Well 9), Canning Stock Route	WA
114923	G. incognita sp. nov.	•	•	-20.4500	118.9000	12km Ssw [Sse?] Great N Highway, Marble Bar Road	WA
120728	G. incognita sp. nov.	•	•	-20.4000	118.5167	Boodarie Hill	WA
120729	G. incognita sp. nov.	•	•	-20.4000	118.5167	Boodarie Hill	WA
132544	G. incognita sp. nov.	•	•	-20.5444	118.1708	Degrey RIVER STATION	WA
145555	G. incognita sp. nov.	•	•	-20.4700	118.5900	18km S Port Hedland	WA
145629	G. incognita sp. nov.	•	•	-20.4700	118.5900	18km S Port Hedland	WA
154911	G. incognita sp. nov.	•	•	-20.8075	117.5597	50km E Roebourne	WA
156815	G. incognita sp. nov.	•	•	-20.3802	118.6978	Port Hedland Area	WA
158088	G. incognita sp. nov.	•	•	-21.3104	117.276	5km Nne Python Pool	WA
159848	G. incognita sp. nov.	•	•	-20.9499	117.85	12.5km S Whim Creek Hotel	WA
159904	G. incognita sp. nov.	•	•	-20.9499	117.85	12.5km S Whim Creek Hotel	WA
161128	G. incognita sp. nov.	•	•	-20.8353	119.672	38km Nnw Marble Bar	WA
161379	G. incognita sp. nov.	•	•	-20.8353	119.672	38km Nnw Marble Bar	WA
161691	G. incognita sp. nov.	•	•	-20.3464	118.893	29km Ese Port Hedland	WA
165149	G. incognita sp. nov.	•	•	-21.3104	117.276	5km Nne Python Pool	WA
166624	G. incognita sp. nov.	•	•	-20.8572	117.8342	Mons Cupri Mine	WA
166629	G. incognita sp. nov.	•	•	-20.8663	117.8219	Mons Cupri Mine	WA
24149	G. minuta		•	-17.0666	133.4500	22mi N Newcastle Waters	NT
24243	G. minuta		•	-19.5833	134.3667	12mi E Tennant Creek	NT
24244	G. minuta		•	-19.5833	134.3667	12mi E Tennant Creek	NT
24245	G. minuta		•	-19.5833	134.3667	12mi E Tennant Creek	NT
24246	G. minuta		•	-19.5833	134.3667	12mi E Tennant Creek	NT
24247	G. minuta		•	-19.5833	134.3667	12mi E Tennant Creek	NT
24248	G. minuta		•	-19.5833	134.3667	12mi E Tennant Creek	NT
24249	G. minuta		•	-19.5833	134.3667	12mi E Tennant Creek	NT
24250	G. minuta		•	-19.5833	134.3667	12mi E Tennant Creek	NT
24251	G. minuta		•	-19.5833	134.3667	12mi E Tennant Creek	NT
24252	G. minuta		•	-19.5833	134.3667	12mi E Tennant Creek	NT
24253	G. minuta		•	-19.5833	134.3667	12mi E Tennant Creek	NT
24254	G. minuta		•	-19.5833	134.3667	12mi E Tennant Creek	NT
24255	G. minuta		•	-19.5833	134.3667	12mi E Tennant Creek	NT
24256	G. minuta		•	-19.5833	134.3667	12mi E Tennant Creek	NT
24257	G. minuta		•	-19.5833	134.3667	12mi E Tennant Creek	NT
24258	G. minuta		•	-19.5833	134.3667	12mi E Tennant Creek	NT
24259	G. minuta		•	-19.5833	134.3667	12mi E Tennant Creek	NT
24269	G. minuta		•	-20.0500	134.2000	29mi S Tennant Creek	NT
24270	G. minuta		•	-20.0500	134.2000	29mi S Tennant Creek	NT
24271	G. minuta		•	-20.0500	134.2000	29mi S Tennant Creek	NT
24272	G. minuta		•	-20.0500	134.2000	29mi S Tennant Creek	NT
24300	G. minuta		•	-20.5666	134.2667	Devils Marbles, 12km N Wauchope	NT
77994	G. montium	•		-26.0000	126.7500	23km Ne Warburton	WA
90606	G. montium	•		-21.6166	119.0233	Woodstock Station	WA
90767	G. montium	•		-21.6116	118.9556	Woodstock Station	WA
90825	G. montium	•		-21.6166	118.9500	Woodstock Hs	WA
90826	G. montium	•		-21.6166	118.9500	Woodstock Hs	WA
90848	G. montium	•		-21.6166	119.0233	Woodstock Station	WA
90853	G. montium	•		-21.6166	118.9500	Woodstock Hs	WA
90903	G. montium	•		-21.6166	118.9500	Woodstock Hs	WA
90928	G. montium	•		-21.6166	118.9500	Woodstock Hs	WA
90929	G. montium	•		-21.6166	118.9500	Woodstock Hs	WA
98094	G. montium	•		-26.1333	126.5833	Warburton	WA
100689	G. montium	•	•	-21.6166	118.9533	Woodstock Station	WA
100775	G. montium	•	•	-21.4080	118.9278	Woodstock Station	WA
104110	G. montium	•		-21.6219	118.9531	Woodstock Station	WA
104114	G. montium	•		-21.6219	118.9531	Woodstock Station	WA
104135	G. montium	•		-21.6116	118.9556	Woodstock Station	WA
104146	G. montium	•		-21.6219	118.9531	Woodstock Station	WA
104220	G. montium	•	•	-21.5263	119.1492	Woodstock Station	WA
104936	G. montium	•		-21.6219	118.9531	Woodstock Station	WA
104937	G. montium	•		-21.6219	118.9531	Woodstock Station	WA
104938	G. montium	•		-21.6219	118.9531	Woodstock Station	WA
104939	G. montium	•		-21.6219	118.9531	Woodstock Station	WA
104946	G. montium	•	•	-21.6219	118.9531	Woodstock Station	WA
106273	G. montium	•		-21.6222	118.9533	Woodstock Hs	WA
106275	G. montium	•		-21.6222	118.9533	Woodstock Hs	WA
108947	G. montium	•		-21.8833	122.3667	25km Se Telfer	WA
108948	G. montium	•		-21.8833	122.3667	25km Se Telfer	WA
110236	G. montium	•		-22.182	119.933	Bonney Downs Homestead	WA
110248	G. montium	•		-22.7073	119.709	12km Ne Mile Camp	WA
110271	G. montium	•		-22.7073	119.709	12km Ne Mile Camp	WA
110306	G. montium	•		-22.7073	119.709	12km Ne Mile Camp	WA
110321	G. montium	•		-22.6757	119.841	14km Wsw Roy Hill Station	WA
110763	G. montium	•	•	-23.4575	120.3225	Jimblebar East	WA
111746	G. montium	•	•	-23.3639	120.295	17km E Wheelarra Hill	WA
111803	G. montium	•	•	-23.4711	120.215	14km Se Wheelarra Hill	WA
111852	G. montium	•		-23.4908	120.3172	11km N Red Hill	WA
111863	G. montium	•	•	-23.4128	120.317	20km Ese Wheelarra Hill	WA
111987	G. montium	•	•	-22.5164	120.659	36km Nw Balfour Downs Homestead	WA
113590	G. montium	•	•	-21.9833	118.8333	42km Nne Auski Roadhouse	WA
114914	G. montium	•		-23.7166	119.7167	40km S Capricorn Roadhouse	WA
114924	G. montium	•		-21.6500	120.0833	25km N Nullagine	WA
115627	G. montium	•	•	-29.5333	114.9833	Cliff Head	WA
117145	G. montium	•	•	-27.9666	123.7667	Yamana Station	WA
120065	G. montium	•		-23.5430	120.1347	50km E Newman(Jimblebar Mine Site)	WA
120730	G. montium	•		-20.4000	118.5167	Boodarie Hill	WA
125474	G. montium	•		-23.3166	120.0333	30km E Newman	WA
125475	G. montium	•		-23.3166	120.0333	30km E Newman	WA
125489	G. montium	•		-23.3166	120.0333	30km E Newman	WA
125490	G. montium	•		-23.3166	120.0333	30km E Newman	WA
129901	G. montium	•		-23.2500	118.6667	West Angelas, 100km Wnw Newman	WA
129931	G. montium	•		-23.2500	118.6667	West Angelas, 100km Wnw Newman	WA
131488	G. montium	•		-23.3375	119.6967	Mount Whaleback	WA
131489	G. montium	•		-23.3852	119.6367	Mount Whaleback	WA
131490	G. montium	•		-23.3852	119.6367	Mount Whaleback	WA
131737	G. montium	•		-24.6158	126.2231	Clutterbuck Hills	WA
131746	G. montium	•		-22.3647	117.8633	Four Corners Bore, Hamersley Station	WA
132551	G. montium	•		-20.2263	119.1794	De Grey River Station	WA
132553	G. montium	•		-20.2802	119.2019	De Grey River Station	WA
132678	G. montium	•	•	-20.5833	120.3000	Yarrie, 20km Sse Shay Gap	WA
132683	G. montium	•		-20.5788	120.0053	Yarrie, 20km Sse Shay Gap	WA
135041	G. montium	•		-23.3500	120.7833	Jiggalong	WA
135118	G. montium	•	•	-30.8625	120.9067	Bullabulling	WA
139014	G. montium	•		-19.8083	121.4639	Mandora	WA
139229	G. montium	•		-21.2663	120.4553	Old Meentheena Homestead	WA
139610	G. montium	•		-22.4408	121.128	3.5km Wsw Mount Hodgson	WA
145336	G. montium	•		-25.2752	120.6511	Carnarvon Range	WA
145513	G. montium	•		-20.9100	118.6800	69km S Port Hedland	WA
145675	G. montium	•		-22.3000	119.0333	Abydos Station	WA
151491	G. montium	•		-26.0750	121.4522	Lorna Glen Station	WA
154278	G. montium	•		-22.2591	119.0264	Fortescue Marsh	WA
154287	G. montium	•		-22.2591	119.0264	Fortescue Marsh	WA
154295	G. montium	•		-22.2591	119.0264	Fortescue Marsh	WA
154518	G. montium	•		-20.6000	120.3167	Yarri Mining Camp	WA
154523	G. montium	•		-20.6000	120.3167	Yarri Mining Camp	WA
154524	G. montium	•	•	-20.6000	120.3167	Yarri Mining Camp	WA
156232	G. montium	•		-20.5716	120.2492	Cattle Gorge	WA
156311	G. montium	•		-22.2263	118.9536	Chichester Range	WA
156312	G. montium	•		-22.2263	118.9536	Chichester Range	WA
156313	G. montium	•		-22.2263	118.9536	Chichester Range	WA
156317	G. montium	•		-22.2258	118.9597	Chichester Range	WA
156321	G. montium	•	•	-22.2255	118.9706	Chichester Range	WA
156442	G. montium	•		-22.2144	118.9622	Chichester Range	WA
156444	G. montium	•		-22.2225	118.9111	Chichester Range	WA
156600	G. montium	•		-21.6200	121.2139	Woodie Woodie Minesite Area	WA
156679	G. montium	•		-20.6491	120.3031	10km S Yarrie Minesite	WA
156816	G. montium	•	•	-20.3802	118.6978	Port Hedland Area	WA
156817	G. montium	•	•	-20.3705	118.6969	Port Hedland Area	WA
157081	G. montium	•		-22.2591	119.0264	Fortescue Marsh	WA
157083	G. montium	•		-22.2591	119.0264	Fortescue Marsh	WA
157130	G. montium	•		-22.3669	119.7147	38.3km Se Roy Hill	WA
158124	G. montium	•	•	-22.2941	119.061	9km Ne Cowra Line Camp	WA
158171	G. montium	•		-22.2941	119.061	9km Ne Cowra Line Camp	WA
158192	G. montium	•	•	-22.3175	118.98	1km N Mulga Downs Outcamp	WA
158194	G. montium	•		-22.3018	119.013	6km N Cowra Line Camp	WA
158215	G. montium	•		-22.3894	119.7753	32.6km Se Roy Hill	WA
160142	G. montium	•		-21.289	121.096	13km Se Braeside	WA
160256	G. montium	•		-21.905	120.100	2km Ssw Nullagine	WA
161140	G. montium	•		-22.1178	119.877	10.5km Nw Bonney Downs Homestead	WA
161141	G. montium	•	•	-22.182	119.933	Bonney Downs Homestead	WA
161243	G. montium	•	•	-20.5256	118.077	45km Nne Whim Creek Hotel	WA
161287	G. montium	•		-21.202	121.020	1km Braeside	WA
161346	G. montium	•	•	-20.9336	119.904	31km Nne Marble Bar	WA
161347	G. montium	•		-20.9336	119.904	31km Nne Marble Bar	WA
161435	G. montium	•		-20.9336	119.904	31km Nne Marble Bar	WA
161473	G. montium	•		-20.9108	119.65	30km Nnw Marble Bar	WA
161513	G. montium	•	•	-20.8542	120.853	16.5km E Warrawagine Homestead	WA
161656	G. montium	•		-20.1619	119.367	26km Nw Goldsworthy	WA
162215	G. montium	•		-23.2136	119.202	5.5km Ne Giles Point	WA
162918	G. montium	•		-20.0847	119.7561	7km E Ylbalgul, Pardoo	WA
163096	G. montium	•		-23.2136	119.202	5.5km Ne Giles Point	WA
163964	G. montium	•		-20.7481	120.931	27km Ene Warrawagine Homestead	WA
164111	G. montium	•		-22.2230	118.9553	250km Nnw Newman	WA
164113	G. montium	•	•	-22.2077	118.8200	250km Nnw Newman	WA
164289	G. montium	•	•	-24.5669	126.2544	Mina Mina Clutterbuck Hills, Gibson Desert	WA
165001	G. montium	•		-22.2941	119.061	9km Ne Cowra Line Camp	WA
166310	G. montium	•		-24.6936	128.7628	4.2km Sse Pungkulpirri Waterhole	WA
166311	G. montium	•		-25.9386	128.3897	Morgan Range	WA
166312	G. montium	•		-25.9386	128.3897	Morgan Range	WA
166317	G. montium	•		-25.9386	128.3897	Morgan Range	WA
166318	G. montium	•		-25.9386	128.3897	Morgan Range	WA
166321	G. montium	•	•	-25.7583	128.5983	3.4km Ne Mount Fanny	WA
170387	G. montium	•		-22.6033	120.783	23km Nnw Balfour Downs Homestead	WA
170390	G. montium	•		-22.6111	120.729	25km Nw Balfour Downs Homestead	WA
170816	G. montium	•		-21.480	119.414	Old Pilga Homestead	WA
170817	G. montium	•		-21.480	119.414	Old Pilga Homestead	WA
170834	G. montium	•	•	-21.492	119.412	Spear Hill Mine	WA
170838	G. montium	•	•	-21.492	119.412	Spear Hill Mine	WA
170848	G. montium	•	•	-21.4381	119.541	35.5km Sw Marble Bar	WA
170859	G. montium	•		-21.3761	119.374	7.5km Sse The Island Hill	WA
170890	G. montium	•		-21.4381	119.541	35.5km Sw Marble Bar	WA
174324	G. montium	•	•	-20.318	118.639	Cooke Point, Port Hedland	WA
112645	G. ocellata sp. nov.	•	•	-20.7980	115.3492	Barrow Island	WA
117687	G. ocellata sp. nov.	•		-20.5666	115.5667	Varanus Island	WA
117688	G. ocellata sp. nov.	•		-20.5666	115.5667	Varanus Island	WA
125413	G. ocellata sp. nov.	•	•	-20.7666	115.4000	Barrow Island	WA
165739	G. ocellata sp. nov.	•	•	-20.8500	115.4000	Barrow Island	WA
165741	G. ocellata sp. nov.	•	•	-20.8500	115.4000	Barrow Island	WA
165743	G. ocellata sp. nov.	•	•	-20.8000	115.3833	Barrow Island	WA
165744	G. ocellata sp. nov.	•	•	-20.7666	115.4500	Barrow Island	WA
165745	G. ocellata sp. nov.		•	-20.7666	115.4500	Barrow Island	WA
165746	G. ocellata sp. nov.	•	•	-20.7666	115.4500	Barrow Island	WA
165747	G. ocellata sp. nov.	•	•	-20.8000	115.3833	Barrow Island	WA
165751	G. ocellata sp. nov.	•	•	-20.7166	115.4667	Barrow Island	WA
165752	G. ocellata sp. nov.	•		-20.7166	115.4667	Barrow Island	WA
165753	G. ocellata sp. nov.	•	•	-20.7166	115.4667	Barrow Island	WA
165971	G. ocellata sp. nov.	•	•	-20.3866	115.5511	Trimouille Island	WA
165972	G. ocellata sp. nov.	•	•	-20.3866	115.5511	Trimouille Island	WA
165973	G. ocellata sp. nov.	•	•	-20.4227	115.5317	Hermite Island	WA
165974	G. ocellata sp. nov.	•	•	-20.4227	115.5317	Hermite Island	WA
165975	G. ocellata sp. nov.	•	•	-20.4227	115.5317	Hermite Island	WA
172939	G. ocellata sp. nov.		•	-20.7241	115.4719	WAPET Barge Landing, Barrow Island	WA
173013	G. ocellata sp. nov.		•	-20.7961	115.4311	Barrow Island Settlement	WA
94955	G. pilbara	•		-21.3333	124.7500	29km W Thompson Hills	WA
102167	G. pilbara	•	•	-22.6022	118.5208	5.8km Nnw Mount Windell	WA
108603	G. pilbara	•	•	-21.8000	116.2333	15km Sw Pannawonica	WA
108632	G. pilbara	•	•	-21.8000	116.2333	15km Sw Pannawonica	WA
108633	G. pilbara	•	•	-21.8000	116.2333	15km Sw Pannawonica	WA
108635	G. pilbara	•	•	-21.8000	116.2333	15km Sw Pannawonica	WA
112678	G. pilbara	•	•	-21.7038	115.1278	7.5km Sse Onslow	WA
112705	G. pilbara	•	•	-21.7038	115.1278	7.5km Sse Onslow	WA
119934	G. pilbara	•	•	-22.4666	117.3000	3.5km Ne Mount Brockman	WA
127509	G. pilbara	•	•	-21.7333	115.0833	10km S Onslow	WA
129336	G. pilbara	•	•	-21.7833	114.8500	1km SE Griffin Gas Plant, 30km WSW Onslow	WA
129337	G. pilbara	•	•	-21.7833	114.8500	1km SE Griffin Gas Plant, 30km WSW Onslow	WA
129338	G. pilbara	•	•	-21.7833	114.8500	1km SE Griffin Gas Plant, 30km WSW Onslow	WA
129339	G. pilbara	•	•	-21.7833	114.8500	1km SE Griffin Gas Plant, 30km WSW Onslow	WA
129420	G. pilbara	•	•	-21.7833	114.8500	1km SE Griffin Gas Plant, 30km WSW Onslow	WA
131001	G. pilbara	•		-21.3127	117.2339	Mount Herbert Area, Millstream-Chichester National Park	WA
131070	G. pilbara	•	•	-22.8166	127.6500	Ca 10km W Kiwirrkurra	WA
131748	G. pilbara	•	•	-22.3333	117.8667	Four Corners Bore, Hamersley Station	WA
134445	G. pilbara	•		-22.7708	128.2286	Angas Hills	WA
135348	G. pilbara	•	•	-22.2919	117.2989	Mount Brockman	WA
135389	G. pilbara	•	•	-22.4666	117.3000	Mount Brockman	WA
135466	G. pilbara	•		-22.4666	117.3000	Mount Brockman Area	WA
139204	G. pilbara	•		-21.9666	115.1833	25km W Mount Minnie Homestead	WA
139205	G. pilbara	•		-21.9666	115.1833	25km W Mount Minnie Homestead	WA
139440	G. pilbara	•	•	-21.9738	115.3733	Mount Minnie	WA
139441	G. pilbara	•	•	-21.9738	115.3733	Mount Minnie	WA
140311	G. pilbara	•	•	-21.4116	117.1561	Millstream-Chichester Np	WA
140312	G. pilbara	•	•	-21.4116	117.1561	Millstream-Chichester Np	WA
142459	G. pilbara	•		-22.7708	128.2286	Angas Hills	WA
142891	G. pilbara	•		-22.8505	127.8325	7.5km Se Kiwirrkurra	WA
142892	G. pilbara	•		-22.7708	128.2286	Angas Hills	WA
142905	G. pilbara	•		-22.8505	127.8325	7.5km Se Kiwirrkurra	WA
142952	G. pilbara	•		-22.8505	127.8325	7.5km Se Kiwirrkurra	WA
142970	G. pilbara	•		-22.8505	127.8325	7.5km Se Kiwirrkurra	WA
142995	G. pilbara	•		-22.8505	127.8325	7.5km Se Kiwirrkurra	WA
157285	G. pilbara	•	•	-22.2997	114.5931	Yanrey Station	WA
157287	G. pilbara	•		-22.2997	114.5931	Yanrey Station	WA
157953	G. pilbara	•		-23.2527	122.7017	Lake Disappointment	WA
158313	G. pilbara	•	•	-22.6036	114.3931	9.2km N Giralia Homestead	WA
158434	G. pilbara	•	•	-22.6833	114.3667	Giralia Station	WA
158435	G. pilbara	•	•	-22.5869	114.3872	11km N Giralia Homestead	WA
158437	G. pilbara	•	•	-22.5869	114.3872	11km N Giralia Homestead	WA
158438	G. pilbara	•	•	-22.5869	114.3872	11km N Giralia Homestead	WA
158439	G. pilbara	•	•	-22.5869	114.3872	11km N Giralia Homestead	WA
160214	G. pilbara	•		-21.4077	120.071	52.5km N Nullagine	WA
163973	G. pilbara	•	•	-20.7392	120.894	24km Ne Warrawagine Homestead	WA
165099	G. pilbara	•		-21.518	117.043	8km Nnw Millstream Homestead	WA
165100	G. pilbara	•		-21.5186	117.0425	TERMITE SITE, 0.3KM N YELLOW GATE Between SITES 11 & 12 PW	WA
165101	G. pilbara	•		-21.518	117.043	8km Nnw Millstream Homestead	WA
165104	G. pilbara	•		-21.518	117.043	8km Nnw Millstream Homestead	WA
165131	G. pilbara	•		-21.326	117.215	2.6km Wnw Python Pool	WA
165132	G. pilbara	•		-21.326	117.215	2.6km Wnw Python Pool	WA
170583	G. pilbara	•		-21.7792	115.248	21km Se Onslow	WA
170584	G. pilbara	•		-21.7792	115.248	21km Se Onslow	WA
170592	G. pilbara	•		-21.7792	115.248	21km Se Onslow	WA
170593	G. pilbara	•		-21.7792	115.248	21km Se Onslow	WA
170740	G. pilbara	•		-21.6272	116.446	12.5km E Pannawonica	WA
170754	G. pilbara	•		-21.6272	116.446	12.5km E Pannawonica	WA
170755	G. pilbara	•		-21.6272	116.446	12.5km E Pannawonica	WA
102740	G. purpurascens	•		-24.5291	120.2956	Little Sandy Desert	WA
102816	G. purpurascens	•	•	-21.7061	121.7133	Nifty Mine	WA
102817	G. purpurascens	•	•	-21.7061	121.7133	Nifty Mine	WA
102818	G. purpurascens	•	•	-21.7061	121.7133	Nifty Mine	WA
102819	G. purpurascens	•		-21.7061	121.7133	Nifty Mine	WA
104998	G. purpurascens	•	•	-29.8333	120.1167	Hospital Rocks	WA
104999	G. purpurascens	•	•	-29.8333	120.1167	Hospital Rocks	WA
106259	G. purpurascens	•		-18.0000	122.6000	15km Ese Roebuck Plains Hs	WA
108683	G. purpurascens	•		-27.7166	121.8167	Banjawarn Homestead	WA
108769	G. purpurascens	•	•	-18.6333	125.3500	Big Mona Bores	WA
108772	G. purpurascens	•	•	-18.1500	122.5500	20km Ene Thangoo Homestead	WA
110300	G. purpurascens	•		-22.8201	119.613	4km Ssw Mile Camp	WA
110924	G. purpurascens	•	•	-19.8583	128.8506	120km Nnw Tanami Downs Homestead	WA
112776	G. purpurascens	•	•	-31.0361	123.7347	15km E Zanthus	WA
113413	G. purpurascens	•	•	-30.2250	123.6833	25km Nne Queen Victoria Spring	WA
114548	G. purpurascens	•	•	-19.7666	121.1500	6km E Sandfire Roadhouse	WA
119948	G. purpurascens	•	•	-21.6666	121.5833	Nifty Mine Site, Ca 40km E Woodie Woodie Mine	WA
125473	G. purpurascens	•		-23.3166	120.0333	30km E Newman	WA
126562	G. purpurascens	•	•	-30.4500	120.6833	24km W Rowles Lagoon, Ora Banda	WA
127179	G. purpurascens	•		-21.6666	121.5833	Nifty Mine	WA
127608	G. purpurascens	•	•	-28.5841	122.1494	86km Ene Leonora	WA
130636	G. purpurascens	•		-22.4463	128.2925	Lake Mackay	WA
131056	G. purpurascens	•		-22.8166	127.7500	Kiwirrkurra	WA
131069	G. purpurascens	•		-22.8166	127.6500	Ca 10km W Kiwirrkurra	WA
131072	G. purpurascens	•		-22.8166	127.7500	Kiwirrkurra	WA
131080	G. purpurascens	•		-22.7383	127.2214	Kiwirrkurra Area	WA
134388	G. purpurascens	•	•	-22.4463	128.2925	Lake Mackay	WA
139013	G. purpurascens	•	•	-19.8083	121.4639	Mandora	WA
144329	G. purpurascens	•	•	-26.3402	126.9403	2km S Beal Outstation, Townsend Ridges	WA
151631	G. purpurascens	•	•	-18.1436	124.5661	Liveringa Station	WA
151632	G. purpurascens	•		-18.1022	124.5964	Liveringa Station	WA
154736	G. purpurascens	•	•	-30.4000	119.6333	Bungalbin Hill Area	WA
157471	G. purpurascens	•		-19.5186	128.8203	Tanami Desert	WA
163187	G. purpurascens	•	•	-27.4866	122.3117	Dunkerton	WA
163314	G. purpurascens	•	•	-28.3063	125.8472	Neale Junction Nature Reserve	WA
163315	G. purpurascens	•	•	-28.1633	125.9489	Neale Junction Nature Reserve	WA
163317	G. purpurascens	•	•	-28.3047	126.3597	Neale Junction Nature Reserve	WA
163318	G. purpurascens	•	•	-28.3011	126.2211	Neale Junction Nature Reserve	WA
163319	G. purpurascens	•	•	-27.1105	126.3439	Neale Junction Nature Reserve	WA
164240	G. purpurascens	•		-24.5169	126.2128	Mina Mina Clutterbuck Hills, Gibson Desert	WA
166057	G. purpurascens	•	•	-28.3047	126.3003	Neale Junction Nature Reserve	WA
169893	G. purpurascens	•	•	-22.4255	121.2200	Ashburton Hill	WA
169894	G. purpurascens	•	•	-22.4255	121.2200	Ashburton Hill	WA
172213	G. purpurascens	•	•	-28.3638	127.5119	Great Victoria Desert	WA
172214	G. purpurascens	•	•	-28.3677	127.5167	Great Victoria Desert	WA
172215	G. purpurascens	•	•	-28.3677	127.5167	Great Victoria Desert	WA
108364	G. unguiculata sp. nov.		•	-20.4608	120.0483	Sunrise Hill	WA
108368	G. unguiculata sp. nov.		•	-20.4608	120.0483	Sunrise Hill	WA
108386	G. unguiculata sp. nov.		•	-20.4288	120.0347	Sunrise Hill	WA
108420	G. unguiculata sp. nov.		•	-20.4363	120.0108	Nimingarra	WA
156584	G. unguiculata sp. nov.	•	•	-20.5577	120.1819	Cundaline Gap	WA
156590	G. unguiculata sp. nov.	•		-20.5744	120.1967	Cundaline Gap	WA
161412	G. unguiculata sp. nov.	•	•	-20.4281	119.969	47.5km Ese Goldsworthy	WA
161459	G. unguiculata sp. nov.	•	•	-20.4281	119.969	47.5km Ese Goldsworthy	WA
161460	G. unguiculata sp. nov.	•	•	-20.4281	119.969	47.5km Ese Goldsworthy	WA
161461	G. unguiculata sp. nov.	•	•	-20.4281	119.969	47.5km Ese Goldsworthy	WA
104995	G. variegata	•		-29.7327	119.6169	Old Rainy Rocks	WA
110023	G. variegata	•	•	-20.7945	116.857	6km S Karratha	WA
110308	G. variegata	•		-22.7073	119.709	12km Ne Mile Camp	WA
110515	G. variegata	•		-21.0539	116.134	2km Sw Marda Pool	WA
110519	G. variegata	•		-21.0539	116.134	2km Sw Marda Pool	WA
111848	G. variegata	•	•	-23.3725	120.458	33.5km E Wheelarra Hill	WA
112680	G. variegata	•		-21.7308	115.0969	10km Ssw Onslow	WA
113685	G. variegata	•	•	-30.2833	116.7167	5km E Dalwallinu	WA
113820	G. variegata	•		-30.9500	121.1500	Coolgardie	WA
114039	G. variegata	•		-25.8333	113.5500	Peron Station	WA
114344	G. variegata	•		-20.7333	117.0000	8-10km S Cleaverville	WA
114499	G. variegata	•	•	-28.7000	114.6667	Waggrakine Pass	WA
114501	G. variegata	•		-28.7333	115.0000	Wicherina Dam	WA
114915	G. variegata	•		-23.7166	119.7167	40km S Capricorn Roadhouse	WA
115241	G. variegata	•		-27.5666	114.6667	Eurardy Station	WA
115540	G. variegata	•		-21.6333	114.3833	North Muiron Island	WA
117022	G. variegata	•		-24.8666	113.6333	Babbage Island	WA
117025	G. variegata	•		-25.1500	113.7833	Bush Bay	WA
117153	G. variegata	•		-29.3666	121.2833	Dead Horse Rocks, 6.5 Km N Menzies	WA
117168	G. variegata	•		-31.0666	123.5833	5km Sse Zanthus	WA
117697	G. variegata	•		-24.8561	113.7033	10km E Carnarvon	WA
119033	G. variegata	•		-28.4166	116.2833	Wurarga	WA
119863	G. variegata	•		-24.2227	113.5031	9km E Cape Cuvier	WA
119869	G. variegata	•		-24.2230	113.4914	9km E Cape Cuvier	WA
119870	G. variegata	•		-24.2230	113.4914	9km E Cape Cuvier	WA
119893	G. variegata	•		-24.1930	113.4553	6km Nne Cape Cuvier	WA
120033	G. variegata	•		-20.8000	115.4000	Barrow Island	WA
120390	G. variegata	•		-24.2227	113.5031	9km E Cape Cuvier	WA
120391	G. variegata	•		-24.2227	113.5031	9km E Cape Cuvier	WA
120398	G. variegata	•		-24.4000	113.4000	19km S Cape Cuvier	WA
120508	G. variegata	•		-24.4930	115.0306	Kennedy Range National Park	WA
120576	G. variegata	•		-24.4133	113.7631	18km N Boolanthana Homestead	WA
120621	G. variegata	•		-24.4055	114.4442	13km Wnw Mardathuna Homestead	WA
120622	G. variegata	•		-24.4288	114.5000	8km Nw Mardathuna Homestead	WA
120623	G. variegata	•	•	-24.4288	114.5000	8km Nw Mardathuna Homestead	WA
120624	G. variegata	•		-24.5113	114.6367	10km Ese Mardathuna Homestead	WA
120625	G. variegata	•		-24.4288	114.5000	8km Nw Mardathuna Homestead	WA
120626	G. variegata	•		-24.4288	114.5000	8km Nw Mardathuna Homestead	WA
120627	G. variegata	•		-24.5113	114.6367	10km Ese Mardathuna Homestead	WA
120628	G. variegata	•		-24.5113	114.6367	10km Ese Mardathuna Homestead	WA
120632	G. variegata	•		-24.4069	114.4731	12km Nw Mardathuna Homestead	WA
120651	G. variegata	•		-24.4430	114.5117	6km Ese Mardathuna Homestead	WA
120830	G. variegata	•		-25.8388	113.6064	Near Peron Homestead	WA
120894	G. variegata	•		-26.1916	114.5092	Woodleigh Station	WA
120995	G. variegata	•		-27.2566	114.1531	50km N Kalbarri	WA
121016	G. variegata	•		-25.6252	114.7042	11km Ne Meedo Homestead	WA
121025	G. variegata	•		-25.6538	114.6256	1.2km Ne Meedo Homestead	WA
123102	G. variegata	•		-24.8166	113.7831	14km Ene Carnarvon	WA
123944	G. variegata	•		-22.0000	114.0833	Cape Range, 10km S Exmouth	WA
124925	G. variegata	•		-24.5008	115.0175	Kennedy Range National Park	WA
124930	G. variegata	•		-24.5008	115.0175	Kennedy Range National Park	WA
126739	G. variegata	•		-24.4133	113.7631	18km N Boolanthana Homestead	WA
126752	G. variegata	•		-24.4055	114.4442	13km Wnw Mardathuna Homestead	WA
126759	G. variegata	•		-24.5113	114.6367	10km Ese Mardathuna Homestead	WA
126762	G. variegata	•		-24.4055	114.4442	13km Wnw Mardathuna Homestead	WA
126810	G. variegata	•		-24.5113	114.6367	10km Ese Mardathuna Homestead	WA
126837	G. variegata	•		-24.4130	113.7067	18km N Boolathana Homestead	WA
126866	G. variegata	•		-24.2227	113.5031	9km E Cape Cuvier	WA
127446	G. variegata	•		-21.7500	115.0833	10km S Onslow	WA
127447	G. variegata	•	•	-21.7500	115.0833	10km S Onslow	WA
127504	G. variegata	•		-21.7333	115.0833	10 Km S Onslow	WA
127505	G. variegata	•		-21.7333	115.0833	10 Km S Onslow	WA
129010	G. variegata	•		-21.7550	114.8506	Urala Station	WA
129423	G. variegata	•		-21.7833	114.8500	1km SE Griffin Gas Plant, 30km WSW Onslow	WA
129424	G. variegata	•		-21.7833	114.8500	1km SE Griffin Gas Plant, 30km WSW Onslow	WA
131377	G. variegata	•		-22.3000	114.1167	40km S Exmouth	WA
131386	G. variegata	•		-22.3000	115.0333	Koordarrie Outstation	WA
132220	G. variegata	•		-21.7897	114.8653	Urala Station	WA
132464	G. variegata	•		-23.1166	113.7667	Mauds Landing, Coral Bay	WA
132537	G. variegata	•		-20.6316	116.7947	Burrup Peninsula	WA
132812	G. variegata	•		-31.4333	117.5167	Yorkrakine Hill	WA
132901	G. variegata	•		-32.6666	118.3333	Jilakin Rock	WA
135175	G. variegata	•		-28.4833	113.6833	West Wallabi Island	WA
135480	G. variegata	•		-21.7672	114.8206	Urala Homestead	WA
135481	G. variegata	•		-21.7672	114.8206	Urala Homestead	WA
136313	G. variegata	•		-26.5269	115.5250	Muggon Station	WA
136645	G. variegata	•		-27.7127	119.4006	Lake Mason Station	WA
136772	G. variegata	•		-27.7383	119.2714	Lake Mason Station	WA
137971	G. variegata	•	•	-21.8833	114.0167	Coral Bay	WA
139656	G. variegata	•		-22.7536	114.3233	Centipede Well	WA
140926	G. variegata	•		-33.1666	121.2667	27km Sse Peak Eleanora	WA
141460	G. variegata	•	•	-25.8961	113.9089	Faure Island Homestead	WA
141461	G. variegata	•		-25.8961	113.9089	Faure Island Homestead	WA
141467	G. variegata	•		-25.8836	113.8850	Faure Island	WA
141662	G. variegata	•		-25.7500	113.6583	Cape Rose	WA
141670	G. variegata	•		-26.5166	113.6500	Baudin Island	WA
144114	G. variegata	•	•	-30.3688	121.0675	2km E Ora Banda	WA
144758	G. variegata	•	•	-30.3500	119.5667	Bungalbin Hill Area	WA
144767	G. variegata	•		-30.6166	119.6167	Bungalbin Hill Area	WA
144777	G. variegata	•		-30.4666	119.6000	Bungalbin Hill Area	WA
146951	G. variegata	•		-29.5886	117.4128	Mount Gibson Station	WA
152678	G. variegata	•	•	-28.8963	113.8978	Murray Island	WA
152913	G. variegata	•	•	-30.2402	119.3472	Koolyanobbing Area	WA
152921	G. variegata	•		-30.3144	119.4019	Koolyanobbing Area	WA
154142	G. variegata	•		-20.7850	115.4617	Barrow Island	WA
156280	G. variegata	•		-32.4091	119.7281	42.6km Ne Holt Rock	WA
156487	G. variegata	•		-22.6725	118.9367	Upper Marillana Creek	WA
156674	G. variegata	•		-26.8169	114.6153	North West Coastal Hwy, Near Billabong Roadhouse	WA
156917	G. variegata	•		-28.4372	113.7353	East Wallabi Island	WA
157235	G. variegata	•		-22.1577	114.5286	Yanrey Station	WA
157247	G. variegata	•		-22.1577	114.5286	Yanrey Station	WA
157325	G. variegata	•		-22.2502	114.5078	Yanrey Station	WA
157811	G. variegata	•		-29.1891	116.7119	Karara Shearing Shed	WA
157898	G. variegata	•	•	-32.1208	123.1661	Eyre Highway	WA
158314	G. variegata	•		-22.6486	114.3922	4.8km N Giralia Homestead	WA
158348	G. variegata	•		-22.8769	114.5631	Giralia Station	WA
158383	G. variegata	•	•	-22.7016	114.3231	Giralia Station	WA
158432	G. variegata	•	•	-22.6519	114.1669	Giralia Station	WA
160869	G. variegata	•		-21.0619	116.265	13km Ese Marda Pool	WA
160870	G. variegata	•		-21.0619	116.265	13km Ese Marda Pool	WA
160874	G. variegata	•		-21.0539	116.134	2km Sw Marda Pool	WA
160905	G. variegata	•	•	-20.7945	116.857	6km S Karratha	WA
160966	G. variegata	•		-20.7945	116.857	6km S Karratha	WA
160967	G. variegata	•		-20.7945	116.857	6km S Karratha	WA
160968	G. variegata	•		-20.7945	116.857	6km S Karratha	WA
160976	G. variegata	•		-21.0619	116.265	13km Ese Marda Pool	WA
161011	G. variegata	•	•	-21.0619	116.265	13km Ese Marda Pool	WA
161031	G. variegata	•		-21.0619	116.265	13km Ese Marda Pool	WA
161066	G. variegata	•	•	-21.0557	116.252	11km Ese Marda Pool	WA
162108	G. variegata	•		-22.4253	116.215	26km Wnw Mount Berry	WA
162450	G. variegata	•	•	-26.591	118.497	Meekatharra	WA
163065	G. variegata	•		-22.1697	115.561	7km Sse Mount Minnie	WA
163109	G. variegata	•		-22.7112	116.4	10.5km W Mount De Courcey	WA
163321	G. variegata	•		-28.6883	125.8483	Neale Junction Nature Reserve	WA
165151	G. variegata	•	•	-21.0539	116.134	2km Sw Marda Pool	WA
165160	G. variegata	•		-20.8429	116.367	8.5km Wsw Yanyare River Mouth	WA
165161	G. variegata	•		-21.0619	116.265	13km Ese Marda Pool	WA
165162	G. variegata	•		-21.0619	116.265	13km Ese Marda Pool	WA
165163	G. variegata	•		-21.0619	116.265	13km Ese Marda Pool	WA
165173	G. variegata	•		-22.4193	115.838	19.5km Ssw Mount Amy	WA
165179	G. variegata	•		-21.0619	116.265	13km Ese Marda Pool	WA
165180	G. variegata	•		-21.0619	116.265	13km Ese Marda Pool	WA
165199	G. variegata	•		-21.0619	116.265	13km Ese Marda Pool	WA
165219	G. variegata	•	•	-21.46	115.02	Thevenard Island	WA
165754	G. variegata	•		-20.7166	115.4667	Barrow Island	WA
165755	G. variegata	•	•	-20.7166	115.4667	Barrow Island	WA
165756	G. variegata	•	•	-20.7166	115.4667	Barrow Island	WA
165757	G. variegata	•	•	-20.7166	115.4667	Barrow Island	WA
165758	G. variegata	•		-20.7666	115.4500	Barrow Island	WA
165759	G. variegata	•	•	-20.8166	115.4333	Barrow Island	WA
165760	G. variegata	•		-20.8166	115.4333	Barrow Island	WA
165761	G. variegata	•	•	-20.8166	115.4333	Barrow Island	WA
165762	G. variegata		•	-20.8166	115.4333	Barrow Island	WA
167541	G. variegata	•		-25.4936	114.8650	60km Sw Gascoyne Junction	WA
170525	G. variegata	•		-21.7914	115.464	17km Wnw Peedamulla Homestead	WA
170571	G. variegata	•		-21.7914	115.464	17km Wnw Peedamulla Homestead	WA
170625	G. variegata	•		-21.8417	115.583	4km W Peedamulla Homestead	WA
170626	G. variegata	•		-21.8417	115.583	4km W Peedamulla Homestead	WA
172485	G. variegata	•		-30.4326	120.6377	Credo Station	WA
174320	G. variegata	•	•	-22.64866	114.38688	~2km E Giralia Homested	WA
174321	G. variegata	•	•	-22.68411	114.36755	Giralia Homested	WA
98103	G. versicolor	•	•	-26.1666	126.5500	7km S Warburton	WA
177547	G. versicolor		•	-33.733	143.033	Near Mungo Homestead, Mungo Np	QLD
177548	G. versicolor		•	-33.733	143.033	Near Mungo Homestead, Mungo Np	QLD
177549	G. versicolor		•	-32.583	145.533	Yathong Nature Reserve	QLD
177550	G. versicolor		•	-32.583	145.533	Yathong Nature Reserve	QLD
177551	G. versicolor		•	-32.583	145.533	Yathong Nature Reserve	QLD
177552	G. versicolor		•	-32.583	145.533	Yathong Nature Reserve	QLD
177553	G. versicolor		•	-32.583	145.533	Yathong Nature Reserve	QLD
