# Supplementary material for: Conspicuously concealed: revision of the arid clade of the Gehyra variegata (Gekkonidae) group in Western Australia using an integrative molecular and morphological approach, with the description of five cryptic species
Source: PeerJ. 2018 Jul 19;6:e5334. doi: 10.7717/peerj.5334 (PMC6054870; doi:10.7717/peerj.5334)
Supplement: Supplemental Information 5 [file peerj-06-5334-s005.xlsx]

## Sheet: TransposedMasterFile
Reg	Species	Gender	SVL (mm)	TailL (mm)	HeadL	HeadW	HeadD	OrbitL	EyeNoseL	SnoutEyeL	InterOrbL	InternoseL	LegL	SupraLabs	InfraLabs	InterNarials	Lam4Toe	PreClocPores	HeadL/SVL	HeadW/SVL	HeadD/SVL	SnouteyeL/SVL	SnoutEyeL/HeadL
11518	G. capens	M	43	-	11.55	7.9	4.6	2.74	3.75	4.78	4.2	1.61	5.4	8	7	0	6	12	0.268605	0.183721	0.106977	0.111163	0.413853
11520	G. capens	M	44.5	-	11.83	8.04	5.15	2.85	3.58	5.17	4.7	1.62	5.99	8	7	1	6	11	0.265843	0.180674	0.11573	0.11618	0.437025
11522	G. capens	M	46	-	11.78	8.75	4.86	2.78	3.8	4.7	4.64	1.62	5.82	9	8	0	6	12	0.256087	0.190217	0.105652	0.102174	0.398981
16107	G. capens	M	41	-	11.94	8.52	4.76	3.04	3.66	4.94	4.38	1.61	6.29	8	7	1	7	9	0.29122	0.207805	0.116098	0.120488	0.413735
16110	G. capens	M	42	-	12.06	7.5	4.7	3.01	3.8	5.12	4.57	1.45	6.5	9	9	0	7	10	0.287143	0.178571	0.111905	0.121905	0.424544
16999	G. capens	M	38.5	-	11.2	7.12	4.33	2.67	3.62	4.76	3.96	1.22	5.46	9	8	1	7	12	0.290909	0.184935	0.112468	0.123636	0.425
52926	G. capens	M	40.5	-	11.64	8.28	4.76	2.92	3.53	5.17	4.2	1.48	5.99	8	7	1	7	11	0.287407	0.204444	0.117531	0.127654	0.444158
52927	G. capens	M	38	-	10.62	7.44	4.3	2.83	3.51	4.92	4.07	1.5	5.84	9	8	1	6	10	0.279474	0.195789	0.113158	0.129474	0.463277
52995	G. capens	M	45.5	-	11.63	8.42	4.91	3.05	3.85	4.89	4.58	1.67	5.52	8	8	0	6	10	0.255604	0.185055	0.107912	0.107473	0.420464
61097	G. capens	M	41	-	11.83	7.5	4.62	2.93	3.82	5	4.19	1.44	5.87	8	8	1	6	11	0.288537	0.182927	0.112683	0.121951	0.422654
61098	G. capens	M	39	-	11.52	7.19	4.53	2.99	3.7	5.02	4.08	1.56	6.43	9	8	1	6	11	0.295385	0.184359	0.116154	0.128718	0.435764
61273	G. capens	M	42.5	-	12.1	7.8	4.32	2.93	3.83	5.29	4.42	1.45	5.05	9	7	1	6	9	0.284706	0.183529	0.101647	0.124471	0.43719
61274	G. capens	M	40.5	-	12.22	7.48	4.33	2.73	3.59	4.9	3.28	1.27	5.8	9	7	1	6	11	0.301728	0.184691	0.106914	0.120988	0.400982
61475	G. capens	M	35.5	-	10.89	6.71	3.58	2.71	3.28	4.38	3.33	1.36	5.48	8	7	1	6	12	0.306761	0.189014	0.100845	0.12338	0.402204
134628	G. capens	M	43	-	11.74	7.43	4.79	2.7	3.59	4.55	4.04	1.69	5.89	8	7	0	6	11	0.273023	0.172791	0.111395	0.105814	0.387564
11523	G. capens	F	36	-	9.74	5.9	3.48	2.12	3.02	4.12	3.21	1.22	5.01	8	7	0	7	-	0.270556	0.163889	0.0966667	0.114444	0.422998
16108	G. capens	F	40	-	11.73	7.84	4.41	3.05	3.82	5.21	4.05	1.63	6.07	8	7	1	6	-	0.29325	0.196	0.11025	0.13025	0.44416
16109	G. capens	F	35	-	10.69	6.65	3.91	2.61	3.43	4.57	3.77	1.45	5.28	8	8	0	6	-	0.305429	0.19	0.111714	0.130571	0.427502
27576	G. capens	F	34	-	10.51	6.62	3.81	2.72	3.37	4.17	3.08	1.24	5.42	8	8	1	6	-	0.309118	0.194706	0.112059	0.122647	0.396765
52131	G. capens	F	38	-	10.36	7.19	3.92	2.52	3.27	4.39	3.56	1.35	5.45	8	7	1	6	-	0.272632	0.189211	0.103158	0.115526	0.423745
52924	G. capens	F	43	-	11.68	7.67	4.63	2.99	3.89	5.37	4.07	1.8	6.24	8	7	1	6	-	0.271628	0.178372	0.107674	0.124884	0.45976
52925	G. capens	F	39	-	12.3	7.48	4.65	2.74	3.6	4.97	4.38	1.51	6.04	8	7	1	7	-	0.315385	0.191795	0.119231	0.127436	0.404065
61099	G. capens	F	36	-	11.14	7.22	3.97	2.79	3.41	4.66	3.96	1.51	5.68	8	7	1	6	-	0.309444	0.200556	0.110278	0.129444	0.418312
61198	G. capens	F	39	45	11.48	7.33	3.97	2.79	3.33	4.76	4.17	1.84	5.28	9	9	1	6	-	0.294359	0.187949	0.101795	0.122051	0.414634
139561	G. capens	F	44.5	-	12.05	8.05	3.89	3.01	3.7	5.29	4.13	1.65	6.41	9	9	1	7	-	0.270787	0.180899	0.0874157	0.118876	0.439004
24243	G. minuta	M	34	-	9.77	6.32	3.28	2.42	2.85	3.94	3.23	1.36	4.72	9	7	1	7	12	0.287353	0.185882	0.0964706	0.115882	0.403275
24244	G. minuta	M	40	-	11.32	7.23	4.21	2.6	3.2	4.45	3.56	1.31	5.18	8	8	1	6	12	0.283	0.18075	0.10525	0.11125	0.39311
24246	G. minuta	M	37	-	10.71	7.27	4.05	2.67	3.15	4.58	3.82	1.45	5.64	8	8	1	6	11	0.289459	0.196486	0.109459	0.123784	0.427638
24249	G. minuta	M	37	-	10.35	6.83	3.82	2.51	3.26	4.42	3.8	1.4	5.3	8	7	0	6	13	0.27973	0.184595	0.103243	0.119459	0.427053
24250	G. minuta	M	40	-	10.6	6.92	3.63	2.63	3.32	4.83	3.73	1.59	5.67	8	8	1	6	12	0.265	0.173	0.09075	0.12075	0.45566
24251	G. minuta	M	36	37	10.37	6.39	3.41	2.5	3.15	3.91	3.09	1.33	5.16	9	8	0	7	14	0.288056	0.1775	0.0947222	0.108611	0.377049
24258	G. minuta	M	35	-	9.76	6.62	3.71	2.4	2.97	4.2	3.62	1.37	5.04	8	7	1	7	12	0.278857	0.189143	0.106	0.12	0.430328
24259	G. minuta	M	32	-	9.75	6.8	3.42	2.57	3	4.1	2.82	1.28	4.66	7	6	1	6	12	0.304688	0.2125	0.106875	0.128125	0.420513
24269	G. minuta	M	38.5	-	10.88	7.35	4.51	2.51	3.23	4.48	3.41	1.37	5.17	8	8	0	6	12	0.282597	0.190909	0.117143	0.116364	0.411765
24270	G. minuta	M	39	-	10.68	7.09	4.27	2.63	3.28	4.44	3.65	1.18	5.02	7	7	0	6	10	0.273846	0.181795	0.109487	0.113846	0.41573
24149	G. minuta	F	26.5	-	7.8	5.01	2.78	2.07	2.35	3.4	2.8	1.24	3.48	8	7	1	7	-	0.29434	0.189057	0.104906	0.128302	0.435897
24245	G. minuta	F	37	-	10.14	6.57	3.5	2.59	2.89	4.02	3.29	1.35	5.25	7	6	0	6	-	0.274054	0.177568	0.0945946	0.108649	0.39645
24247	G. minuta	F	36.5	-	9.6	6.43	3.53	2.2	3.12	4.13	3.44	1.25	5.26	9	8	1	7	-	0.263014	0.176164	0.0967123	0.113151	0.430208
24248	G. minuta	F	39	-	10.37	7.21	3.8	2.71	3.05	4.29	3.51	1.4	5.11	9	7	1	7	-	0.265897	0.184872	0.0974359	0.11	0.413693
24252	G. minuta	F	24	21	7.37	4.43	2.68	2.05	2.08	3.22	2.14	1.03	3.3	7	7	1	6	-	0.307083	0.184583	0.111667	0.134167	0.436906
24253	G. minuta	F	27.5	-	7.97	5.57	2.97	2.15	2.3	3.14	2.53	1.17	3.87	8	8	1	6	-	0.289818	0.202545	0.108	0.114182	0.393977
24254	G. minuta	F	34	-	9.06	6.34	3.26	2.54	2.62	3.85	3.24	1.38	4.44	8	7	1	6	-	0.266471	0.186471	0.0958824	0.113235	0.424945
24255	G. minuta	F	35	-	9.58	6.64	3.57	2.54	2.99	4.43	3.52	1.44	5.05	8	7	0	7	-	0.273714	0.189714	0.102	0.126571	0.462422
24256	G. minuta	F	27.5	-	8.23	5.03	2.88	1.97	2.47	3.68	2.85	1.11	3.9	8	7	1	7	-	0.299273	0.182909	0.104727	0.133818	0.447145
24257	G. minuta	F	28	-	8.06	5.07	2.56	1.89	2.59	3.45	2.65	1.03	4.02	8	7	1	6	-	0.287857	0.181071	0.0914286	0.123214	0.42804
24271	G. minuta	F	36.5	37	10.17	7.2	3.99	2.69	3.22	4.51	3.68	1.34	5.27	8	7	0	7	-	0.27863	0.19726	0.109315	0.123562	0.443461
24272	G. minuta	F	36	-	10.05	6.18	3.75	2.64	3.08	4.05	3.38	1.22	4.72	8	7	1	7	-	0.279167	0.171667	0.104167	0.1125	0.402985
24300	G. minuta	F	35	-	9.49	6.45	3.78	2.37	3.15	4.34	3.34	1.33	4.83	7	6	1	7	-	0.271143	0.184286	0.108	0.124	0.457323
100689	G. mont	M	49	-	13.6	8.85	4.85	3.06	4.33	5.49	3.91	1.67	6.36	9	8	0	7	10	0.277551	0.180612	0.0989796	0.112041	0.403676
104220	G. mont	M	49	54	13.43	8.83	4.83	3.34	4.14	5.26	4.37	1.73	6.61	10	9	0	7	15	0.274082	0.180204	0.0985714	0.107347	0.39166
110763	G. mont	M	47.5	-	12.83	7.82	3.92	2.9	3.68	5.24	4.37	1.38	6.31	8	8	1	6	10	0.270105	0.164632	0.0825263	0.110316	0.408418
111803	G. mont	M	41	47	11.44	7.13	3.95	2.44	3.44	4.27	3.69	1.63	5.22	8	9	1	7	12	0.279024	0.173902	0.0963415	0.104146	0.373252
117145	G. mont	M	42.5	-	12.03	8.01	4.07	3.03	3.67	4.74	3.87	1.62	5.72	9	8	1	7	13	0.283059	0.188471	0.0957647	0.111529	0.394015
132678	G. mont	M	49.5	57	13.38	8.84	4.81	3.2	4.12	5.51	4.38	1.58	6.62	9	9	1	7	14	0.270303	0.178586	0.0971717	0.111313	0.411809
135118	G. mont	M	46	-	12.64	9.37	4.99	3.2	3.84	5.21	4.07	1.63	5.95	8	8	1	7	13	0.274783	0.203696	0.108478	0.113261	0.412184
156321	G. mont	M	44.5	-	11.89	7.78	4.6	2.62	3.4	4.84	3.78	1.73	5.59	9	8	1	7	13	0.267191	0.174831	0.103371	0.108764	0.407065
158192	G. mont	M	47	52	12.62	8.31	4.4	2.68	3.66	4.72	3.96	1.63	6.08	9	9	1	7	10	0.268511	0.176809	0.093617	0.100426	0.37401
161243	G. mont	M	43	-	11.8	8.07	4.65	2.72	3.77	4.65	4.24	1.73	5.87	8	8	1	7	11	0.274419	0.187674	0.10814	0.10814	0.394068
161513	G. mont	M	44	-	11.46	7.47	4.12	2.72	4.02	5.32	3.66	1.59	5.99	9	8	1	6	11	0.260455	0.169773	0.0936364	0.120909	0.464223
164113	G. mont	M	46.5	49.5	12.09	7.56	4.54	2.56	3.61	5.2	4.24	1.4	6.17	8	8	1	7	12	0.26	0.162581	0.0976344	0.111828	0.430108
170834	G. mont	M	45	-	12.14	7.78	4.6	3.01	3.93	4.91	4.16	1.47	6.15	9	8	1	7	13	0.269778	0.172889	0.102222	0.109111	0.404448
170838	G. mont	M	48	-	12.93	8.71	4.89	2.83	3.93	5.22	4.09	1.71	6.22	9	9	1	6	12	0.269375	0.181458	0.101875	0.10875	0.403712
170848	G. mont	M	47.5	-	13.18	8.51	5.28	2.83	3.85	5.48	4.07	1.58	6.2	9	8	1	7	11	0.277474	0.179158	0.111158	0.115368	0.415781
100775	G. mont	F	45	50	12.06	7.41	4.45	2.9	4	5.29	3.61	1.65	6.15	9	8	1	7	-	0.268	0.164667	0.0988889	0.117556	0.43864
104946	G. mont	F	45.5	-	12.58	7.96	4.49	3.2	3.96	5.1	4.16	1.58	6.07	10	9	1	7	-	0.276484	0.174945	0.0986813	0.112088	0.405405
111746	G. mont	F	44.5	-	10.92	7.08	3.43	2.65	3.73	5.28	3.91	1.52	5.6	8	8	1	6	-	0.245393	0.159101	0.0770787	0.118652	0.483516
111863	G. mont	F	36.5	-	9.93	6.19	3.05	2.49	3.08	4.01	3.07	1.21	4.72	9	8	0	7	-	0.272055	0.169589	0.0835616	0.109863	0.403827
111987	G. mont	F	44	-	10.86	7.44	3.63	2.51	3.6	4.68	3.8	1.55	5.24	8	7	1	7	-	0.246818	0.169091	0.0825	0.106364	0.430939
113590	G. mont	F	42.5	-	11.51	8	4.02	2.34	3.71	4.76	3.52	1.52	5.21	8	8	1	6	-	0.270824	0.188235	0.0945882	0.112	0.413553
115627	G. mont	F	44.5	-	12.84	8.38	4.42	2.77	4.17	5.32	4.05	1.86	6.28	8	9	1	7	-	0.288539	0.188315	0.0993258	0.119551	0.41433
154524	G. mont	F	47	-	12.77	8.23	4.44	3.22	3.71	5.02	4.01	1.75	5.97	9	9	1	7	-	0.271702	0.175106	0.0944681	0.106809	0.393109
156816	G. mont	F	35.5	40	10.1	6.14	3.37	2.15	3.34	4.18	3.56	1.28	4.19	8	7	1	7	-	0.284507	0.172958	0.0949296	0.117746	0.413861
156817	G. mont	F	39	46	10.28	5.99	3.59	2.52	3.16	4.2	3.23	1.46	5.39	8	8	1	7	-	0.26359	0.15359	0.0920513	0.107692	0.40856
158124	G. mont	F	37	43	10.05	6.44	3.81	2.12	3.36	4.09	3.53	1.55	4.9	10	9	1	7	-	0.271622	0.174054	0.102973	0.110541	0.406965
161346	G. mont	F	46	-	12.52	8.22	4.35	2.85	3.86	5.22	4.04	1.81	6.02	9	9	1	6	-	0.272174	0.178696	0.0945652	0.113478	0.416933
164289	G. mont	F	48	-	12.56	7.74	4.43	2.72	3.76	4.97	4.04	1.81	6.03	7	7	1	6	-	0.261667	0.16125	0.0922917	0.103542	0.395701
166321	G. mont	F	44	-	11.38	7.32	3.43	2.67	3.28	4.32	3.68	1.56	5.5	8	7	1	6	-	0.258636	0.166364	0.0779545	0.0981818	0.379613
174324	G. mont	F	43.5	-	11.2	7.41	4.01	2.55	3.64	4.64	3.72	1.56	6.19	9	8	1	7	-	0.257471	0.170345	0.0921839	0.106667	0.414286
161141	G. mont	F	49	-	12.03	7.88	4.63	2.63	3.87	5.26	4.32	1.66	6.17	8	8	1	7	-	0.24551	0.160816	0.0944898	0.107347	0.43724
108635	G. pilbara	M	44	-	11.21	7.81	4.64	2.5	3.24	4.06	3.04	1.39	5.8	7	6	0	7	11	0.254773	0.1775	0.105455	0.0922727	0.362177
112678	G. pilbara	M	39	-	9.51	6.34	3.97	2.43	3.16	3.71	2.99	1.44	5.56	7	6	0	7	10	0.243846	0.162564	0.101795	0.0951282	0.390116
119934	G. pilbara	M	48	-	12.2	8.57	5.37	2.75	3.86	4.75	3.71	1.35	7	7	6	1	7	12	0.254167	0.178542	0.111875	0.0989583	0.389344
127509	G. pilbara	M	44.5	49	11.06	7.16	4.63	2.99	3.3	4.36	3.29	1.33	6.23	7	7	1	7	13	0.248539	0.160899	0.104045	0.0979775	0.394213
129336	G. pilbara	M	47	-	11.12	7.73	5.17	3.01	3.08	4.35	3.4	1.71	6.63	7	7	0	7	13	0.236596	0.164468	0.11	0.0925532	0.391187
129339	G. pilbara	M	45	-	12	8.37	4.59	2.91	3.37	4.6	3.51	1.6	6.37	8	8	1	7	14	0.266667	0.186	0.102	0.102222	0.383333
131070	G. pilbara	M	46.5	-	11.62	7.85	4.64	2.84	3.51	4.74	3.39	1.37	6.09	8	7	0	7	11	0.249892	0.168817	0.0997849	0.101935	0.407917
131748	G. pilbara	M	46	-	11.53	8.81	4.86	2.96	3.44	3.91	3.2	1.39	6.67	8	7	1	8	14	0.250652	0.191522	0.105652	0.085	0.339115
135389	G. pilbara	M	44	-	11.76	7.52	4.63	2.52	3.25	4.59	3.01	1.47	6.24	8	7	0	7	13	0.267273	0.170909	0.105227	0.104318	0.390306
139441	G. pilbara	M	44.5	-	11.4	7.65	4.99	2.85	3.21	4.31	3.42	1.75	6.64	8	7	0	7	13	0.25618	0.17191	0.112135	0.0968539	0.37807
158313	G. pilbara	M	51.5	-	12.29	9.28	5.24	3.26	3.62	4.7	3.82	1.43	6.66	7	7	0	7	13	0.238641	0.180194	0.101748	0.0912621	0.382425
158434	G. pilbara	M	47	-	12.15	8.23	4.47	2.82	3.49	4.79	3.46	1.61	7.31	8	7	0	7	13	0.258511	0.175106	0.0951064	0.101915	0.394239
158437	G. pilbara	M	47.5	-	11.44	8.7	4.52	2.99	3.3	4.98	4.24	1.55	7.68	7	7	1	7	12	0.240842	0.183158	0.0951579	0.104842	0.435315
163973	G. pilbara	M	35	42	9.44	7	4.13	2.53	2.51	3.76	3.16	1.08	5.51	7	7	1	6	13	0.269714	0.2	0.118	0.107429	0.398305
102167	G. pilbara	F	43	-	11.3	7.82	4.97	2.86	3.13	4.26	3.45	1.41	6.19	8	6	0	7	-	0.262791	0.18186	0.115581	0.0990698	0.376991
108603	G. pilbara	F	46	-	11.7	8.54	4.72	2.76	3.4	4.71	3.66	1.61	6.89	8	6	0	7	-	0.254348	0.185652	0.102609	0.102391	0.402564
108632	G. pilbara	F	39	-	10.72	6.9	4.22	2.66	3.23	4.14	2.96	1.65	6.24	8	7	1	7	-	0.274872	0.176923	0.108205	0.106154	0.386194
108633	G. pilbara	F	43	-	10.62	7.31	3.83	2.47	3.09	4.51	3.24	1.57	5.99	7	7	0	7	-	0.246977	0.17	0.0890698	0.104884	0.42467
112705	G. pilbara	F	34.5	36	9.43	6.22	3.82	2.32	2.52	3.52	2.21	1.07	5.12	8	7	0	7	-	0.273333	0.18029	0.110725	0.102029	0.373277
129337	G. pilbara	F	41.5	45	10.63	7.3	4.95	2.96	3.06	4.05	3.22	1.52	6	8	7	1	7	-	0.256145	0.175904	0.119277	0.0975904	0.380997
129338	G. pilbara	F	43	49	10.72	7.64	4.31	2.9	3.15	4.29	3	1.5	6	7	7	0	7	-	0.249302	0.177674	0.100233	0.0997674	0.400187
129420	G. pilbara	F	43	-	11.39	6.7	4.47	2.94	3.08	4.21	3.26	1.46	6	7	6	0	7	-	0.264884	0.155814	0.103953	0.097907	0.369622
135348	G. pilbara	F	42	-	10.29	7.41	4.32	2.53	3.29	4.31	3.11	1.62	6.36	8	7	1	7	-	0.245	0.176429	0.102857	0.102619	0.418853
139440	G. pilbara	F	33.5	-	9.61	5.87	3.74	2.39	2.66	3.99	2.57	1	4.55	7	6	0	6	-	0.286866	0.175224	0.111642	0.119104	0.415193
140311	G. pilbara	F	43.5	-	10.44	7.17	4.46	2.78	3.06	4.53	3.41	1.38	6.14	8	7	1	7	-	0.24	0.164828	0.102529	0.104138	0.433908
140312	G. pilbara	F	37	42	9.92	6	3.7	2.62	2.84	4.26	2.59	1.33	5.01	8	6	0	7	-	0.268108	0.162162	0.1	0.115135	0.429435
157285	G. pilbara	F	43	-	10.71	7.25	3.39	3.06	3.16	4.4	3.62	1.48	6.25	8	7	0	7	-	0.24907	0.168605	0.0788372	0.102326	0.410831
158435	G. pilbara	F	45	-	10.65	7.74	4.59	2.62	3.23	4.28	3.49	1.54	6.52	7	6	1	7	-	0.236667	0.172	0.102	0.0951111	0.401878
158438	G. pilbara	F	46.5	-	10.19	7.29	4.42	2.63	3.25	4.34	3.57	1.72	6.2	8	7	1	6	-	0.21914	0.156774	0.0950538	0.0933333	0.425908
158439	G. pilbara	F	43.5	-	10.11	7.43	3.84	2.77	2.91	4.18	3.48	1.61	5.91	9	7	1	7	-	0.232414	0.170805	0.0882759	0.096092	0.413452
102816	G. purp	M	57	-	14.93	10.86	6.56	3.29	4.72	6.08	4.72	1.66	7.52	10	8	0	7	9	0.26193	0.190526	0.115088	0.106667	0.407234
102818	G. purp	M	56	-	15.83	10.33	6.71	3.29	4.65	5.83	5.07	2.15	7.37	10	9	1	7	10	0.282679	0.184464	0.119821	0.104107	0.368288
104998	G. purp	M	54.5	-	15.33	10.06	5.05	3.35	4.96	6.34	5.08	2.05	8.01	9	8	1	8	10	0.281284	0.184587	0.0926606	0.11633	0.413568
104999	G. purp	M	50	-	13.78	9.16	5.28	3.43	4.56	5.78	5.09	1.99	7.03	9	8	1	7	10	0.2756	0.1832	0.1056	0.1156	0.419448
108772	G. purp	M	53.5	-	14.66	9.81	4.86	2.85	4.63	5.92	4.42	1.95	7.07	9	8	1	7	10	0.274019	0.183364	0.0908411	0.110654	0.40382
112776	G. purp	M	58	-	16.81	11.3	7	2.58	6.24	7.67	5.91	2.34	8.09	9	9	1	7	10	0.289828	0.194828	0.12069	0.132241	0.456276
113413	G. purp	M	57	-	15.71	10.58	6.23	3.36	5.2	6.52	5.14	2.07	8.06	10	9	1	7	10	0.275614	0.185614	0.109298	0.114386	0.415022
114548	G. purp	M	46.5	-	13.08	8.61	5.54	2.81	4.33	5.64	4.06	1.43	6.77	9	8	1	7	8	0.28129	0.185161	0.11914	0.12129	0.431193
119948	G. purp	M	66.5	-	18.41	12.08	6.98	3.23	5.36	6.96	5.84	2.48	8.26	9	8	1	7	10	0.276842	0.181654	0.104962	0.104662	0.378055
126562	G. purp	M	61	-	16.76	11.76	6.65	3.12	5.26	6.89	5.53	2.12	8.63	9	8	1	7	9	0.274754	0.192787	0.109016	0.112951	0.411098
127608	G. purp	M	55.5	-	15.44	9.81	6.09	3.44	4.68	6	5.35	2.05	6.88	9	8	1	8	9	0.278198	0.176757	0.10973	0.108108	0.388601
139013	G. purp	M	51	-	13.42	9.05	5.94	3	4.42	5.55	4.8	1.93	6.21	9	8	0	7	9	0.263137	0.177451	0.116471	0.108824	0.413562
144329	G. purp	M	45.5	-	13.17	8.35	4.98	3.01	4.13	5.05	4.23	1.87	5.72	9	9	1	7	9	0.289451	0.183516	0.109451	0.110989	0.383447
163187	G. purp	M	53	-	15.45	9.02	5.99	3.2	4.75	5.99	4.5	2.05	7.96	9	8	0	8	10	0.291509	0.170189	0.113019	0.113019	0.387702
163314	G. purp	M	55	-	15.25	10.29	5.64	3.27	4.57	5.82	4.43	2.01	7.63	9	9	1	8	9	0.277273	0.187091	0.102545	0.105818	0.381639
166057	G. purp	M	52	-	15.05	9.86	5.58	3.45	4.58	6.22	4.59	1.95	7.38	9	8	1	8	9	0.289423	0.189615	0.107308	0.119615	0.413289
169894	G. purp	M	67	-	18.76	13.25	7.49	3.37	5.86	7.31	6.02	2.63	8.89	10	10	1	8	11	0.28	0.197761	0.111791	0.109104	0.389659
172214	G. purp	M	56	-	14.74	9.53	6.12	3.34	4.91	6.25	4.71	2.08	7.26	10	8	1	8	11	0.263214	0.170179	0.109286	0.111607	0.424016
172215	G. purp	M	54.5	-	15.3	9.18	5.95	3.13	4.67	6.28	5.47	2.02	7.39	9	9	1	8	11	0.280734	0.16844	0.109174	0.115229	0.410458
102817	G. purp	F	51	55	13.55	9.06	5.85	2.75	4.39	5.58	4.16	2.14	6.36	10	9	0	7	-	0.265686	0.177647	0.114706	0.109412	0.411808
108769	G. purp	F	49	-	12.07	7.8	4.91	2.75	4.16	4.97	3.92	1.9	6.43	9	9	1	6	-	0.246327	0.159184	0.100204	0.101429	0.411765
110924	G. purp	F	50	-	12.82	8.69	4.48	2.9	4.25	5.19	4.37	1.67	6.91	9	8	0	7	-	0.2564	0.1738	0.0896	0.1038	0.404836
134388	G. purp	F	50	-	12.93	8.25	4.73	2.71	3.99	5.26	4.42	1.97	6.48	10	9	1	7	-	0.2586	0.165	0.0946	0.1052	0.406806
154736	G. purp	F	51	-	14.16	9.88	5.27	3.05	4.81	5.89	4.36	1.67	6.96	9	9	1	8	-	0.277647	0.193725	0.103333	0.11549	0.41596
163315	G. purp	F	51	-	14.71	10.22	5.4	3.3	4.52	6.09	4.17	2.06	7.04	9	9	1	7	-	0.288431	0.200392	0.105882	0.119412	0.414004
163317	G. purp	F	51	-	14.34	9.11	4.7	3.38	4.38	5.57	4.09	1.72	7.14	9	8	1	8	-	0.281176	0.178627	0.0921569	0.109216	0.388424
163318	G. purp	F	52	54	14.13	9.12	4.83	3.2	4.75	5.93	4.44	1.82	7.44	11	10	1	8	-	0.271731	0.175385	0.0928846	0.114038	0.419674
163319	G. purp	F	48	-	14.15	8.22	4.82	3.04	4.51	6.01	3.96	1.58	6.87	10	9	1	8	-	0.294792	0.17125	0.100417	0.125208	0.424735
169893	G. purp	F	57	58	16.14	10.63	6.19	3.59	5.07	6.42	5.39	2.43	8.64	9	9	1	8	-	0.283158	0.186491	0.108596	0.112632	0.39777
172213	G. purp	F	48	-	14.75	10.34	5.36	3.38	5.15	6.36	4.96	1.91	7.83	9	9	1	8	-	0.307292	0.215417	0.111667	0.1325	0.431186
151631	G. purp	F	45	-	12.33	7.13	4.33	2.55	3.69	4.76	4.06	1.4	6.16	9	9	0	6	-	0.274	0.158444	0.0962222	0.105778	0.38605
108368	G. unguic	M	38	-	9.44	6.61	3.34	2.43	2.58	4.14	3.35	1.34	5.39	8	8	0	6	11	0.248421	0.173947	0.0878947	0.108947	0.438559
108420	G. unguic	M	39	-	10.49	6.77	3.4	2.48	2.97	4.14	3.49	1.29	5.19	8	7	0	6	13	0.268974	0.17359	0.0871795	0.106154	0.394662
156584	G. unguic	M	39	42	10.8	7.23	3.78	2.62	3.17	4.14	3.61	1.3	5.08	8	7	1	6	13	0.276923	0.185385	0.0969231	0.106154	0.383333
161461	G. unguic	M	38	45	10.26	7.19	2.88	2.77	3.32	4.42	3.19	1.34	4.77	8	8	0	6	12	0.27	0.189211	0.0757895	0.116316	0.430799
108364	G. unguic	F	34.5	-	9.82	6.11	2.88	2.29	2.49	4.13	2.85	1.27	4.79	7	7	1	6	-	0.284638	0.177101	0.0834783	0.11971	0.42057
108386	G. unguic	F	34.5	-	9.06	5.76	2.57	2.14	2.53	3.81	2.91	1.23	4.48	7	7	1	6	-	0.262609	0.166957	0.0744928	0.110435	0.42053
161412	G. unguic	F	35.5	-	10.04	6.09	3.11	2.56	2.98	4.25	3.13	1.29	4.81	8	7	1	6	-	0.282817	0.171549	0.0876056	0.119718	0.423307
161459	G. unguic	F	38	-	10.27	6.76	3.37	2.64	3.39	4.37	3.34	1.36	5.18	8	7	1	6	-	0.270263	0.177895	0.0886842	0.115	0.425511
161460	G. unguic	F	39	-	10.02	6.88	3.34	2.59	3.22	4.6	3.37	1.38	5.61	7	7	1	7	-	0.256923	0.17641	0.085641	0.117949	0.459082
113685	G. variag	M	46	-	13.05	9.2	5.05	3.27	3.89	4.93	4.56	1.96	6.51	8	8	1	8	15	0.283696	0.2	0.109783	0.107174	0.377778
141460	G. variag	M	46	-	12.04	8.94	4.91	2.95	3.63	4.67	4.2	1.82	6.13	9	9	0	6	11	0.261739	0.194348	0.106739	0.101522	0.387874
144114	G. variag	M	44	-	12.33	8.01	4.54	2.74	3.6	4.76	4.24	1.78	5.78	9	9	1	7	13	0.280227	0.182045	0.103182	0.108182	0.38605
152913	G. variag	M	44	-	12.33	8.37	4.91	2.76	3.92	5.15	4.32	1.62	6.08	8	7	1	7	15	0.280227	0.190227	0.111591	0.117045	0.41768
157898	G. variag	M	50.5	-	13.49	9.68	4.98	2.73	4.13	5.57	4.8	2	6.86	9	8	1	8	10	0.267129	0.191683	0.0986139	0.110297	0.412898
158432	G. variag	M	40.5	-	11.68	7.41	4.67	2.38	3.33	4.48	3.9	1.62	5.83	9	8	1	6	10	0.288395	0.182963	0.115309	0.110617	0.383562
160905	G. variag	M	38	-	10.5	6.78	3.54	2.18	2.89	4.33	4.05	1.42	4.92	8	8	1	6	11	0.276316	0.178421	0.0931579	0.113947	0.412381
161011	G. variag	M	37	-	9.35	7	4.24	2.27	3.15	4.1	3.79	1.47	5	9	8	0	6	11	0.252703	0.189189	0.114595	0.110811	0.438503
161066	G. variag	M	41	-	10.86	7.84	4.57	2.37	3.37	4.62	3.95	1.31	5.79	8	6	0	6	11	0.264878	0.19122	0.111463	0.112683	0.425414
162450	G. variag	M	52.5	-	14.01	9.49	5.4	2.76	4.22	5.59	4.6	1.67	6.92	9	7	0	6	11	0.266857	0.180762	0.102857	0.106476	0.399001
165151	G. variag	M	39.5	44	10.6	6.99	4.78	2.35	3.15	4.24	3.6	1.39	5.57	9	8	0	6	11	0.268354	0.176962	0.121013	0.107342	0.4
165755	G. variag	M	44.5	-	12.86	7.75	4.64	2.67	3.52	5.21	3.84	1.65	5.68	8	8	1	6	10	0.288989	0.174157	0.10427	0.117079	0.405132
165759	G. variag	M	42	52	12.21	7.78	4.22	2.69	3.72	4.65	3.93	1.72	5.6	9	8	0	6	11	0.290714	0.185238	0.100476	0.110714	0.380835
165761	G. variag	M	40	46	11.14	7.2	4.15	2.6	3.17	4.58	4.01	1.46	4.78	9	8	0	6	12	0.2785	0.18	0.10375	0.1145	0.411131
174321	G. variag	M	47	-	12.94	8.12	4.77	2.63	3.64	4.93	4.39	1.59	6.84	8	7	0	7	11	0.275319	0.172766	0.101489	0.104894	0.380989
110023	G. variag	F	40.5	-	10.29	6.42	4.12	2.43	3.45	4.39	3.2	1.56	5.73	8	8	0	6	-	0.254074	0.158519	0.101728	0.108395	0.426628
111848	G. variag	F	43	-	10.84	7.21	3.62	2.33	3.15	4.31	3.46	1.53	5.64	8	6	0	6	-	0.252093	0.167674	0.084186	0.100233	0.397601
114499	G. variag	F	44.5	-	12.24	8.74	4.31	2.98	3.89	5.48	4.5	1.66	6.23	8	7	1	6	-	0.275056	0.196404	0.0968539	0.123146	0.447712
120623	G. variag	F	44.5	-	11.45	7.8	4.52	3.24	3.75	5.02	4.03	1.53	5.86	8	8	0	6	-	0.257303	0.175281	0.101573	0.112809	0.438428
127447	G. variag	F	47	-	12.55	8.52	5.05	3.12	3.81	4.86	4.32	1.48	5.81	9	8	0	7	-	0.267021	0.181277	0.107447	0.103404	0.387251
137971	G. variag	F	39.5	-	11.04	7.34	4.49	2.47	3.43	4.57	3.64	1.6	5.87	8	8	1	6	-	0.279494	0.185823	0.113671	0.115696	0.413949
144758	G. variag	F	42	-	11.71	8.29	4.11	2.57	3.79	4.83	4.34	1.63	5.9	9	8	1	6	-	0.27881	0.197381	0.0978571	0.115	0.412468
152678	G. variag	F	45	-	12.35	9.25	4.24	2.86	4.26	5.41	4.55	1.68	6.4	8	8	1	6	-	0.274444	0.205556	0.0942222	0.120222	0.438057
158383	G. variag	F	42.5	-	10.94	7.68	4.72	2.26	3.59	4.23	3.94	1.4	5.66	8	7	0	6	-	0.257412	0.180706	0.111059	0.0995294	0.386654
165219	G. variag	F	43	-	11.51	7.36	4.2	2.53	3.63	4.46	3.6	1.6	5.69	8	8	1	6	-	0.267674	0.171163	0.0976744	0.103721	0.387489
165756	G. variag	F	44	-	11.27	7.21	4.63	2.75	3.78	4.94	3.69	1.67	5.87	7	7	1	6	-	0.256136	0.163864	0.105227	0.112273	0.438332
165757	G. variag	F	41.5	-	12.48	7.99	4.62	2.86	3.86	5.27	4.07	1.64	6.16	9	9	1	6	-	0.300723	0.19253	0.111325	0.126988	0.422276
165762	G. variag	F	41	-	10.85	7.61	4.41	2.69	3.6	4.51	3.91	1.67	5.48	9	8	0	6	-	0.264634	0.18561	0.107561	0.11	0.415668
174320	G. variag	F	45	-	11.19	7.63	4.46	2.35	3.72	4.88	3.77	1.47	6.15	8	7	0	6	-	0.248667	0.169556	0.0991111	0.108444	0.436104
177548	G. versi	M	50.5	56	13.38	9.58	5.14	3.29	4.06	5.54	4.28	1.7	7.36	8	7	1	7	15	0.26495	0.189703	0.101782	0.109703	0.414051
177553	G. versi	M	51.5	-	14.85	10.17	5.64	3.26	4.49	5.69	4.36	1.87	6.92	9	9	1	7	13	0.28835	0.197476	0.109515	0.110485	0.383165
98103	G. versi	F	40.5	-	11.11	7.01	4.01	2.47	3.5	4.74	3.47	1.54	5.41	9	8	1	7	-	0.274321	0.173086	0.0990123	0.117037	0.426643
177547	G. versi	F	51.5	-	13.98	9.54	5.31	3.23	4.19	5.71	4.48	1.89	6.56	10	9	1	7	-	0.271456	0.185243	0.103107	0.110874	0.408441
177549	G. versi	F	53	-	14.47	9.84	5.11	3.08	4.34	5.79	4.71	1.91	6.96	9	9	0	7	-	0.273019	0.18566	0.0964151	0.109245	0.400138
177550	G. versi	F	58	-	15.09	11.64	5.43	2.98	4.79	6.34	5.24	2.07	7.95	11	9	0	7	-	0.260172	0.20069	0.0936207	0.10931	0.420146
177551	G. versi	F	48	-	12.76	9.72	4.88	3.07	4.37	5.91	4.96	1.88	6.5	9	9	1	7	-	0.265833	0.2025	0.101667	0.123125	0.463166
177552	G. versi	F	43	-	12.58	8.85	5.01	2.9	3.99	5.24	4.24	1.92	6.3	9	8	0	7	-	0.292558	0.205814	0.116512	0.12186	0.416534
165744	G. ocellata	M	42	-	11.71	7.45	5.39	2.82	3.65	5.02	3.97	1.77	6.33	7	7	1	7	11	0.27881	0.177381	0.128333	0.119524	0.428693
112645	G. ocellata	M	36	-	10.31	6.62	3.73	2.24	3.02	4.39	3.42	1.12	5.85	7	7	1	6	10	0.286389	0.183889	0.103611	0.121944	0.4258
125413	G. ocellata	M	32	36	9.62	6.05	3.81	2.42	3	3.93	3.04	1.14	4.74	7	6	0	6	11	0.300625	0.189062	0.119063	0.122813	0.408524
165743	G. ocellata	M	41	-	12.04	8.34	4.97	2.57	3.81	4.92	3.84	1.58	5.74	8	7	0	6	10	0.293659	0.203415	0.12122	0.12	0.408638
165747	G. ocellata	M	41	-	11.29	7.65	5.37	2.84	3.05	4.59	3.64	1.28	6.02	7	6	0	6	11	0.275366	0.186585	0.130976	0.111951	0.406554
165971	G. ocellata	M	49	-	12.85	9.53	5.44	3.1	3.81	5.15	4.35	1.57	7.4	7	7	0	7	11	0.262245	0.19449	0.11102	0.105102	0.400778
165974	G. ocellata	M	46	-	12.56	8.76	5.59	2.87	3.6	4.61	4	1.61	6.7	8	8	0	6	12	0.273043	0.190435	0.121522	0.100217	0.367038
172939	G. ocellata	M	39	-	11.03	7.38	4.45	2.36	3.39	4.77	3.63	1.47	6.62	8	6	0	6	12	0.282821	0.189231	0.114103	0.122308	0.432457
173013	G. ocellata	M	39	-	10.43	7.3	4.09	2.45	3.03	4.2	3.4	1.35	5.77	8	7	0	6	12	0.267436	0.187179	0.104872	0.107692	0.402685
165739	G. ocellata	F	40	-	10.96	6.7	4.36	2.46	3.43	4.54	3.32	1.22	5.9	7	7	0	6	-	0.274	0.1675	0.109	0.1135	0.414234
165741	G. ocellata	F	41	-	11.25	8.06	5.1	2.76	3.11	4.86	3.65	1.31	6.28	7	6	0	6	-	0.27439	0.196585	0.12439	0.118537	0.432
165745	G. ocellata	F	39	-	10.84	8.23	4.37	2.34	3.14	4.46	3.3	1.23	5.6	7	7	1	6	-	0.277949	0.211026	0.112051	0.114359	0.411439
165746	G. ocellata	F	39	-	10.98	7.17	4.46	2.53	3.69	4.52	3.47	1.25	6.04	6	6	0	6	-	0.281538	0.183846	0.114359	0.115897	0.411658
165751	G. ocellata	F	37.5	40	10.41	6.89	3.83	2.52	3.06	4.07	3.15	1.09	5.19	8	6	0	6	-	0.2776	0.183733	0.102133	0.108533	0.39097
165753	G. ocellata	F	40	-	10.98	6.76	4.54	2.52	3.02	4.33	3.6	1.46	5.82	8	7	1	6	-	0.2745	0.169	0.1135	0.10825	0.394353
165972	G. ocellata	F	49	-	13.18	9.85	5.67	3.15	3.81	5.38	4.25	1.67	7.25	8	8	1	7	-	0.26898	0.20102	0.115714	0.109796	0.408194
165973	G. ocellata	F	37	-	9.91	6.81	3.64	2.39	2.98	3.89	3.39	1.16	5.22	7	6	1	6	-	0.267838	0.184054	0.0983784	0.105135	0.392533
165975	G. ocellata	F	42	-	11.2	7.44	4.81	2.87	3.32	4.69	3.7	1.18	5.99	8	8	1	6	-	0.266667	0.177143	0.114524	0.111667	0.41875
108849	G. crypta	M	49	-	12.65	8.89	4.17	2.98	4.51	5.47	3.8	1.76	6.32	9	8	1	6	12	0.258163	0.181429	0.085102	0.111633	0.432411
110015	G. crypta	M	46	-	12.39	8.74	4.67	2.9	4.11	5.52	4.29	1.65	6.21	8	8	1	7	15	0.269348	0.19	0.101522	0.12	0.445521
110228	G. crypta	M	47	-	12.51	9	5.13	2.81	3.99	5.24	3.84	1.82	6.21	9	8	1	7	12	0.26617	0.191489	0.109149	0.111489	0.418865
111672	G. crypta	M	46	58	13.22	8.79	4.73	3.07	4.25	5.43	4.01	1.85	6.42	10	8	1	6	10	0.287391	0.191087	0.102826	0.118043	0.410741
111693	G. crypta	M	48	55	12.41	8.25	4.69	2.52	4.32	5.53	4.6	1.86	6.58	8	8	1	6	12	0.258542	0.171875	0.0977083	0.115208	0.445608
125745	G. crypta	M	50	-	12.94	8.95	4.88	3.05	4.4	5.72	4.07	1.71	6.76	9	8	1	7	12	0.2588	0.179	0.0976	0.1144	0.44204
129903	G. crypta	M	47.5	-	11.98	8.63	4.56	2.73	3.84	5.28	4.3	1.62	6.27	8	7	0	6	12	0.252211	0.181684	0.096	0.111158	0.440735
156482	G. crypta	M	47.5	-	12.68	7.77	4.64	2.88	3.87	5.14	4.25	1.6	6.47	9	8	1	7	13	0.266947	0.163579	0.0976842	0.108211	0.405363
158069	G. crypta	M	51	58	14.24	8.77	5.13	2.9	4.69	5.64	4.61	1.82	7.08	10	9	1	8	13	0.279216	0.171961	0.100588	0.110588	0.396067
162836	G. crypta	M	48	-	12.58	8.2	4.62	2.9	3.72	5.07	3.57	1.51	5.85	9	8	1	6	11	0.262083	0.170833	0.09625	0.105625	0.403021
165074	G. crypta	M	47	-	12.06	8.07	4.73	2.88	3.46	4.87	4.07	1.77	6.68	9	8	0	7	12	0.256596	0.171702	0.100638	0.103617	0.403814
165142	G. crypta	M	49.5	-	12.5	8.89	4.59	2.89	3.86	5.09	4.06	1.78	6.3	9	8	0	7	16	0.252525	0.179596	0.0927273	0.102828	0.4072
170294	G. crypta	M	43	-	11.33	7.08	4.15	2.63	3.64	4.85	3.75	1.55	6.16	8	8	1	6	11	0.263488	0.164651	0.0965116	0.112791	0.428067
102144	G. crypta	F	43	50	11.34	6.77	3.89	2.55	3.59	4.45	3.55	1.56	5.39	8	7	1	6	-	0.263721	0.157442	0.0904651	0.103488	0.392416
108344	G. crypta	F	56.5	-	14.29	9.74	5.38	3.07	4.54	5.95	4.84	2.13	7.5	9	9	1	7	-	0.25292	0.172389	0.0952212	0.10531	0.416375
108600	G. crypta	F	50.5	-	12.91	8.7	4.37	3.46	4.44	5.98	3.93	1.73	6.99	10	8	1	7	-	0.255644	0.172277	0.0865347	0.118416	0.463207
110025	G. crypta	F	50	-	12.7	7.91	4.84	3.15	4.04	5.63	4.24	1.69	6.76	8	7	0	7	-	0.254	0.1582	0.0968	0.1126	0.443307
110207	G. crypta	F	41	-	10.84	6.79	4.02	2.43	3.28	4.59	3.86	1.5	5.45	9	9	1	7	-	0.26439	0.16561	0.0980488	0.111951	0.423432
110224	G. crypta	F	51	58	13.23	8.77	4.57	3.05	3.96	5.31	4.49	1.93	6.73	9	8	1	7	-	0.259412	0.171961	0.0896078	0.104118	0.401361
110558	G. crypta	F	48.5	-	12.87	8.3	4.78	2.92	4.02	5.38	4.57	1.58	6.57	8	8	1	7	-	0.265361	0.171134	0.0985567	0.110928	0.418026
117151	G. crypta	F	46	-	11.72	8.15	3.71	2.66	3.59	4.85	3.8	1.72	6.18	8	7	1	6	-	0.254783	0.177174	0.0806522	0.105435	0.413823
117152	G. crypta	F	45.5	-	11.86	8.27	3.99	2.49	3.65	4.91	3.57	1.72	5.76	8	7	0	6	-	0.260659	0.181758	0.0876923	0.107912	0.413997
132526	G. crypta	F	48	-	12.55	8.24	4.87	2.92	4.14	5.39	4.17	1.65	6.47	9	8	1	6	-	0.261458	0.171667	0.101458	0.112292	0.429482
132635	G. crypta	F	49	-	12.4	8.65	4.22	3.39	4.05	5.32	4.31	1.7	6.53	9	8	1	7	-	0.253061	0.176531	0.0861224	0.108571	0.429032
151160	G. crypta	F	45	-	11.46	7.53	3.72	2.65	3.65	4.6	3.78	1.61	5.53	8	8	1	6	-	0.254667	0.167333	0.0826667	0.102222	0.401396
157121	G. crypta	F	51	-	12.81	9.16	4.14	2.97	4.03	5.46	4.31	1.9	5.43	8	8	1	6	-	0.251176	0.179608	0.0811765	0.107059	0.42623
162445	G. crypta	F	49	-	11.88	7.81	4.88	2.86	3.85	5.02	3.76	1.66	6.19	9	8	1	7	-	0.242449	0.159388	0.0995918	0.102449	0.422559
165075	G. crypta	F	48	-	12.44	7.7	4.65	2.93	3.8	5	4.1	1.81	6.87	8	8	0	6	-	0.259167	0.160417	0.096875	0.104167	0.401929
165505	G. crypta	F	47	-	12.15	8.05	4.7	2.78	3.75	4.9	4.44	1.65	5.52	8	8	1	7	-	0.258511	0.171277	0.1	0.104255	0.403292
170303	G. crypta	F	43	-	11.78	6.58	4.11	2.4	3.71	4.99	3.86	1.67	5.82	9	8	1	6	-	0.273953	0.153023	0.0955814	0.116047	0.423599
104168	G. incognita	M	50	-	14.64	9.43	5.62	2.84	4.65	5.74	4.89	2.18	7.05	8	8	1	6	16	0.2928	0.1886	0.1124	0.1148	0.392077
108615	G. incognita	M	46	-	11.68	8.08	4.19	2.63	3.7	4.54	4.17	1.88	6.3	9	8	1	7	13	0.253913	0.175652	0.091087	0.0986957	0.388699
132544	G. incognita	M	48.5	-	13.64	10.16	6.28	2.81	4.33	5.2	5.17	2.01	7.13	8	7	0	6	10	0.281237	0.209485	0.129485	0.107216	0.381232
145629	G. incognita	M	42.5	-	12.05	7.91	4.76	2.51	3.9	4.8	4.01	1.81	6.31	9	8	0	6	11	0.283529	0.186118	0.112	0.112941	0.39834
159848	G. incognita	M	46	-	12.8	8.61	5.86	2.65	3.94	5.37	3.88	1.75	7.44	8	7	0	6	12	0.278261	0.187174	0.127391	0.116739	0.419531
159904	G. incognita	M	52	-	13.61	10.31	6.21	3.07	4.09	5.56	5.22	1.74	7.55	8	7	1	6	13	0.261731	0.198269	0.119423	0.106923	0.408523
161128	G. incognita	M	39	-	10.9	6.96	4.1	2.49	3.51	4.62	3.72	1.54	5.68	8	7	1	6	11	0.279487	0.178462	0.105128	0.118462	0.423853
161379	G. incognita	M	44.5	-	12.45	8.9	5.08	2.73	3.74	5.07	4.38	1.62	6.17	9	7	0	6	11	0.279775	0.2	0.114157	0.113933	0.407229
161691	G. incognita	M	36	-	9.79	6.57	3.83	2.42	3.12	4.38	3.65	1.49	5.3	8	7	0	6	11	0.271944	0.1825	0.106389	0.121667	0.447395
99134	G. incognita	F	48.5	-	13.18	8.23	5.24	2.9	3.82	5.07	4.46	1.81	6.19	8	8	1	5	-	0.271753	0.169691	0.108041	0.104536	0.384674
100666	G. incognita	F	43	-	12.31	7.67	4.61	2.27	3.81	4.78	3.49	1.66	6.6	8	7	1	6	-	0.286279	0.178372	0.107209	0.111163	0.388302
104062	G. incognita	F	45	-	11.99	8.04	4.69	2.93	3.74	5.2	3.94	1.68	6.88	9	8	1	5	-	0.266444	0.178667	0.104222	0.115556	0.433695
104169	G. incognita	F	49	-	13.19	8.67	5.21	2.96	4.41	5.49	4.57	1.88	6.65	9	9	1	6	-	0.269184	0.176939	0.106327	0.112041	0.416224
114923	G. incognita	F	44	-	11.95	8.34	4.35	2.62	3.96	5.06	3.61	1.75	6.07	9	8	0	6	-	0.271591	0.189545	0.0988636	0.115	0.423431
120728	G. incognita	F	47	-	13.19	8	4.68	2.6	4.03	5.07	4.24	1.74	6.62	9	7	1	6	-	0.280638	0.170213	0.0995745	0.107872	0.384382
120729	G. incognita	F	48	-	13.02	8.49	3.98	2.84	3.97	5.28	4.49	1.77	6.47	8	7	1	6	-	0.27125	0.176875	0.0829167	0.11	0.40553
135207	G. incognita	F	42.5	-	11.77	9.19	4.65	2.91	3.74	5.22	4.66	1.63	6.32	8	7	0	6	-	0.276941	0.216235	0.109412	0.122824	0.4435
154911	G. incognita	F	45.5	-	12.77	8.63	5.44	2.43	3.69	4.62	4.46	1.74	6.43	9	8	0	6	-	0.280659	0.18967	0.11956	0.101538	0.361785
156815	G. incognita	F	39	42	11.31	7.92	3.98	2.34	3.49	4.36	3.99	1.52	5.61	9	8	0	6	-	0.29	0.203077	0.102051	0.111795	0.3855
158088	G. incognita	F	48.5	-	12.3	9.25	5.49	2.84	4.14	5.29	4.8	1.63	6.45	9	8	1	6	-	0.253608	0.190722	0.113196	0.109072	0.430081
165149	G. incognita	F	45	-	12.72	7.61	4.78	2.65	3.76	5.11	3.49	1.56	6.32	9	8	1	6	-	0.282667	0.169111	0.106222	0.113556	0.40173
166624	G. incognita	F	44	-	12.31	8.68	4.68	2.55	3.97	5.07	4.56	1.94	6.91	9	8	0	6	-	0.279773	0.197273	0.106364	0.115227	0.41186
166629	G. incognita	F	46	-	12.26	9.22	3.69	2.61	3.49	4.9	4.62	1.69	6.87	9	8	1	6	-	0.266522	0.200435	0.0802174	0.106522	0.399674
